# Supplementary material for: Virus-modified paraspeckle-like condensates are hubs for viral RNA processing and their formation drives genomic instability
Source: Springer Nature journal article supplement (doi:10.1038/s41467-024-54592-5), 2024-11-26
Supplement: MOESM1 [file 41467_2024_54592_MOESM1_ESM.pdf]

# **Virus-modified paraspeckle-like condensates are hubs for viral RNA processing and their formation drives genomic instability**

Katherine L Harper<sup>1</sup>, Elena M Harrington, Connor Hayward, Chinedu A Anene, Wiyada Wongwiwat, Robert E White and Adrian Whitehouse

[Supplementary Figures 1-7](#)

[Supplementary Table 1](#)

[Supplementary Source Data](#)

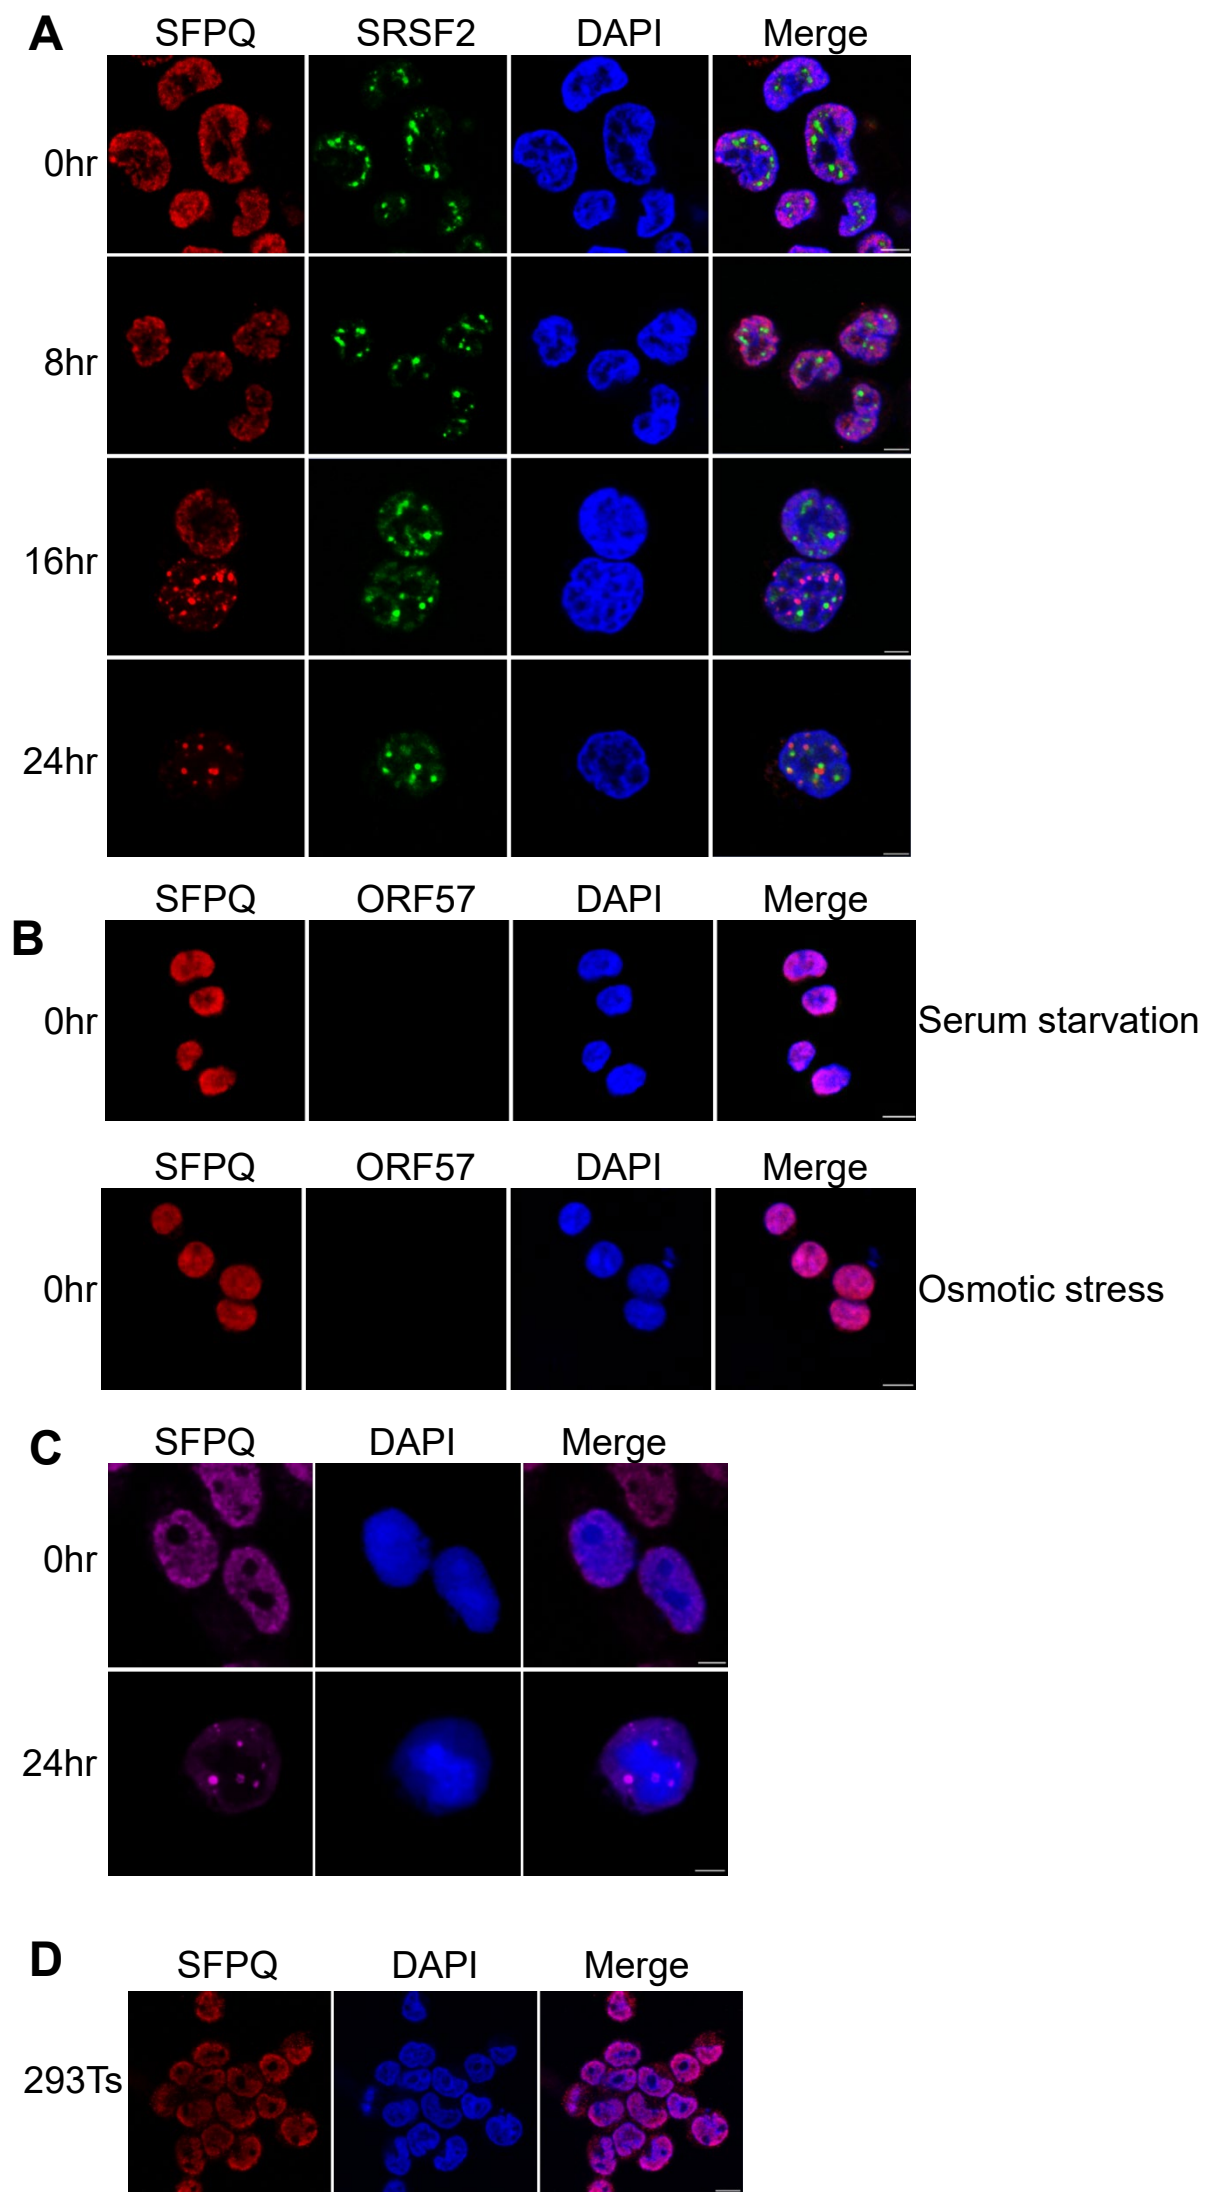

Figure S1 (A-D)

**Figure S1:**

- (A).** IF of TREx-BCBL1-RTA cells at 0, 8, 16 and 24 hours staining for SFPQ (red), SRSF2 (green) and DAPI (blue).
- (B).** IF of TREx-BCBL1-RTA cells during latency, with a 24 hour pre-treatment serum starvation (top row) or exposed to osmotic stress (bottom row). Stained for SFPQ (red), ORF57 (green) and DAPI (blue).
- (C).** IF of HEK-293T-rKSHV.219 cells at 0 and 24 hours post-reactivation with staining against SFPQ (purple) and DAPI (blue).
- (D).** IF of HEK-293T cells with staining against SFPQ (red) and DAPI (blue).

Scale bars are 5 µm in A,C and 10 µm in B and D.

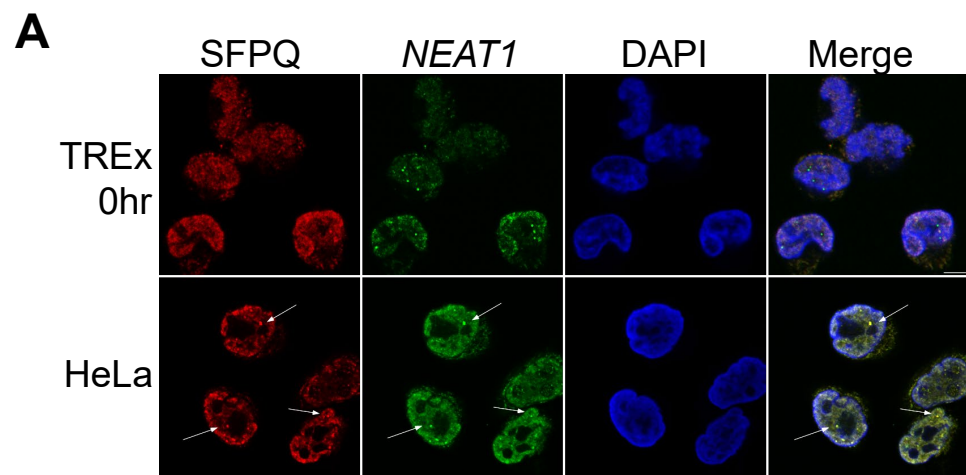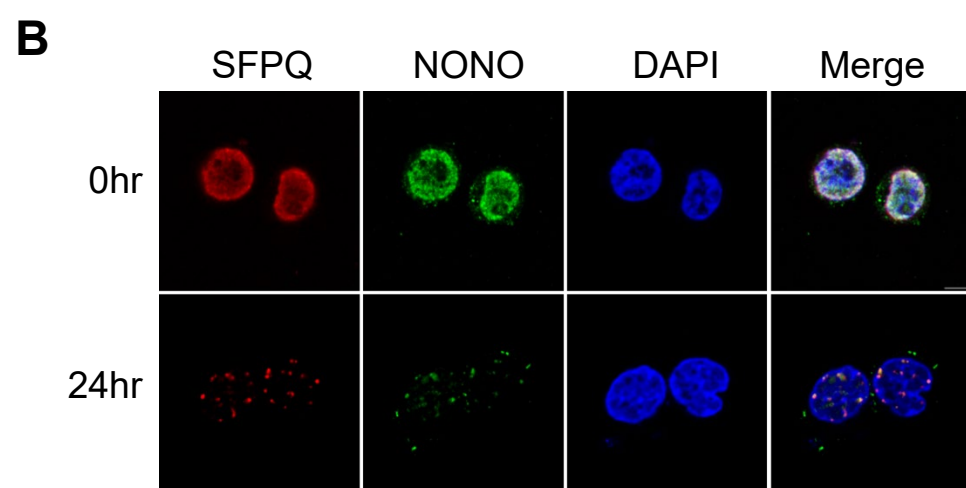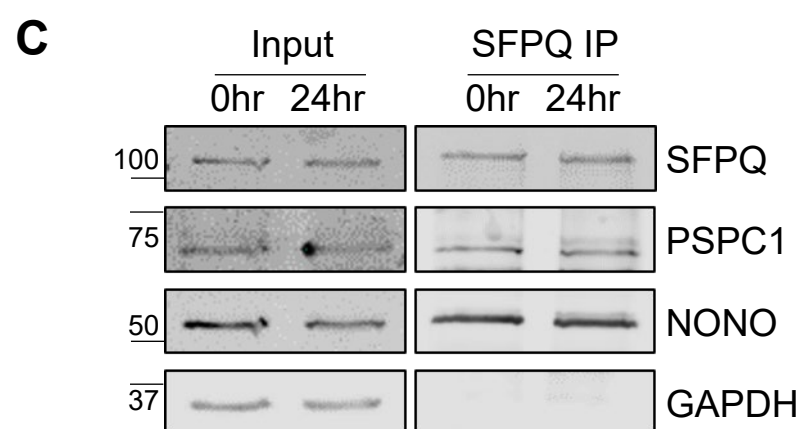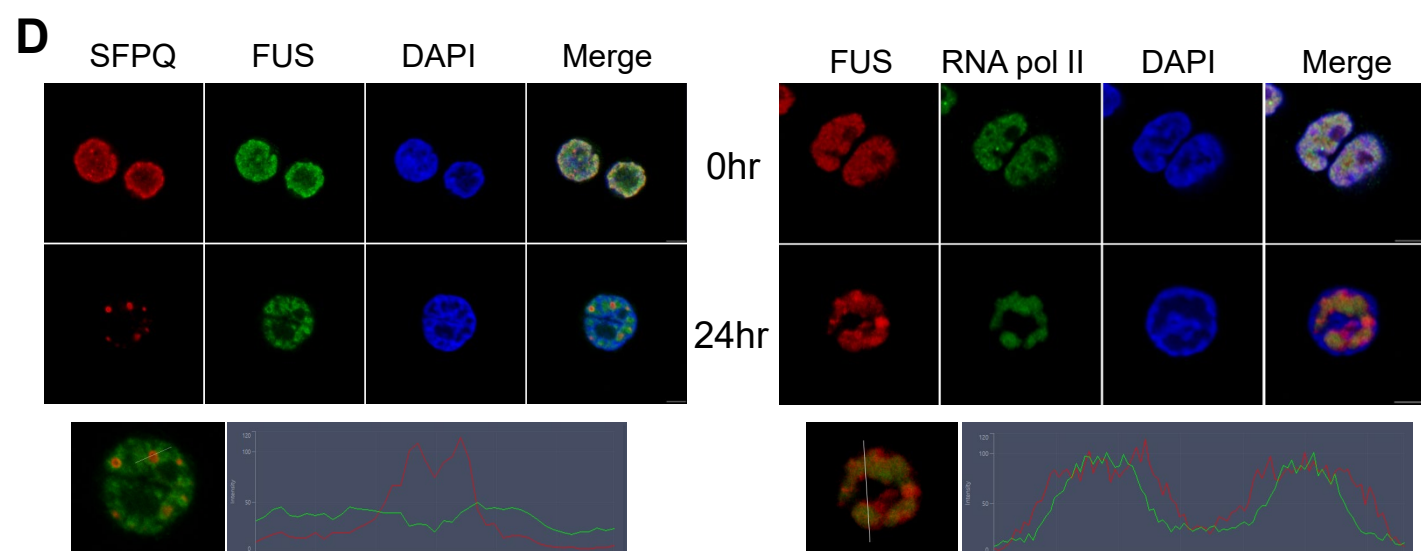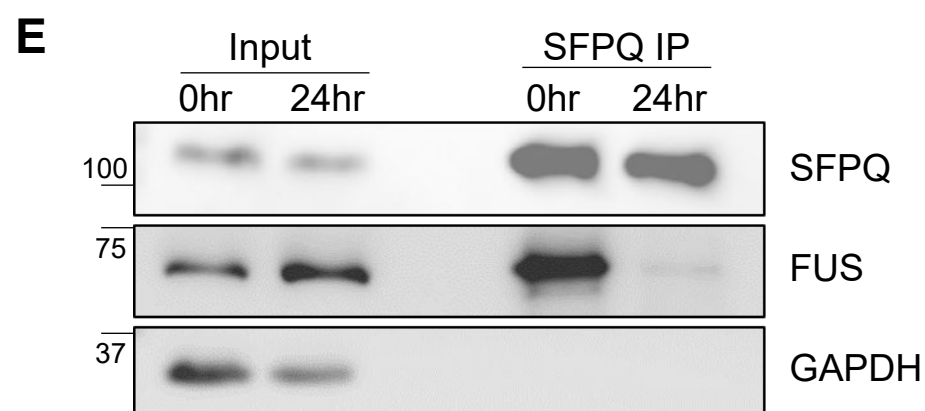

**Figure S2 (A-E)**

**F**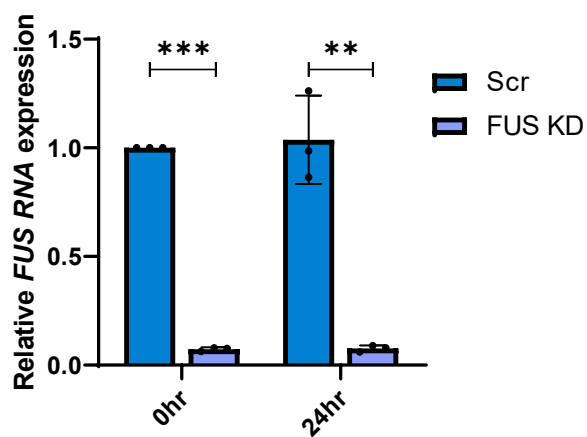**G**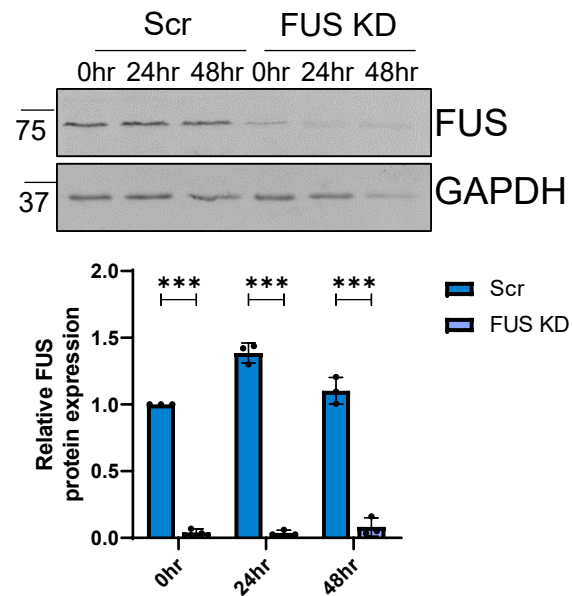**H**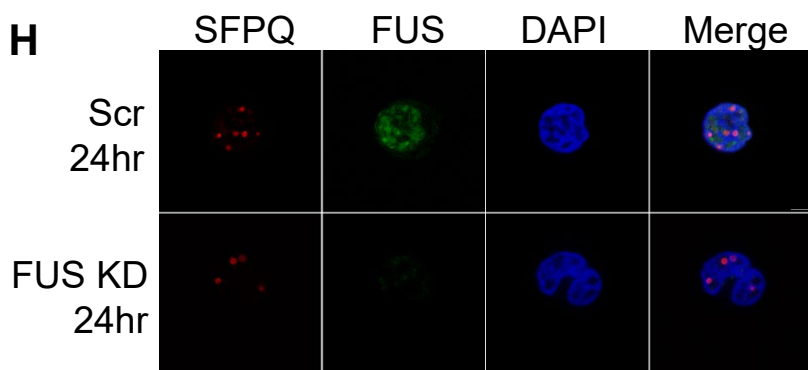**I**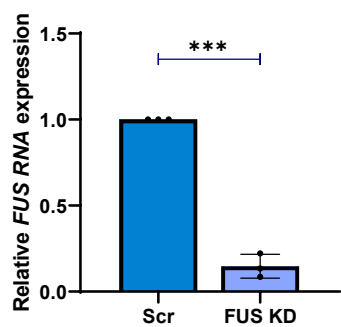**J**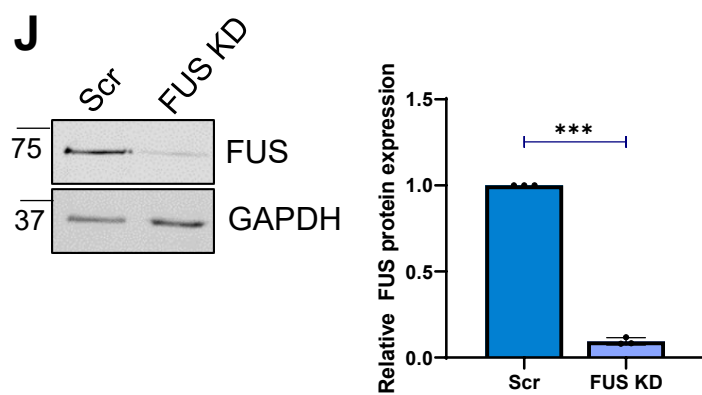**K**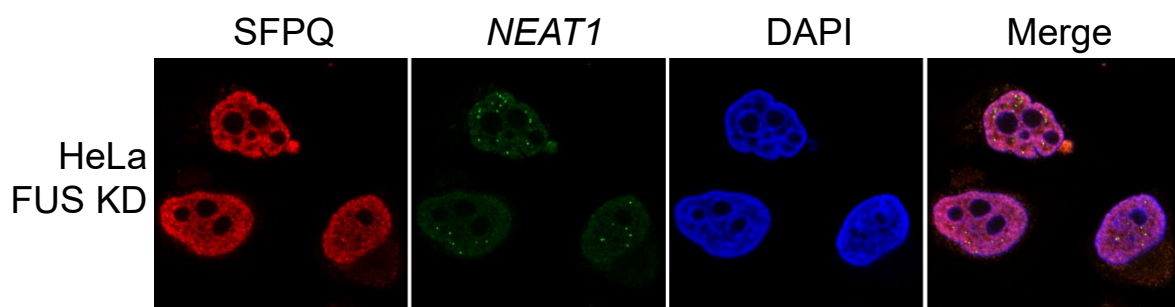**L**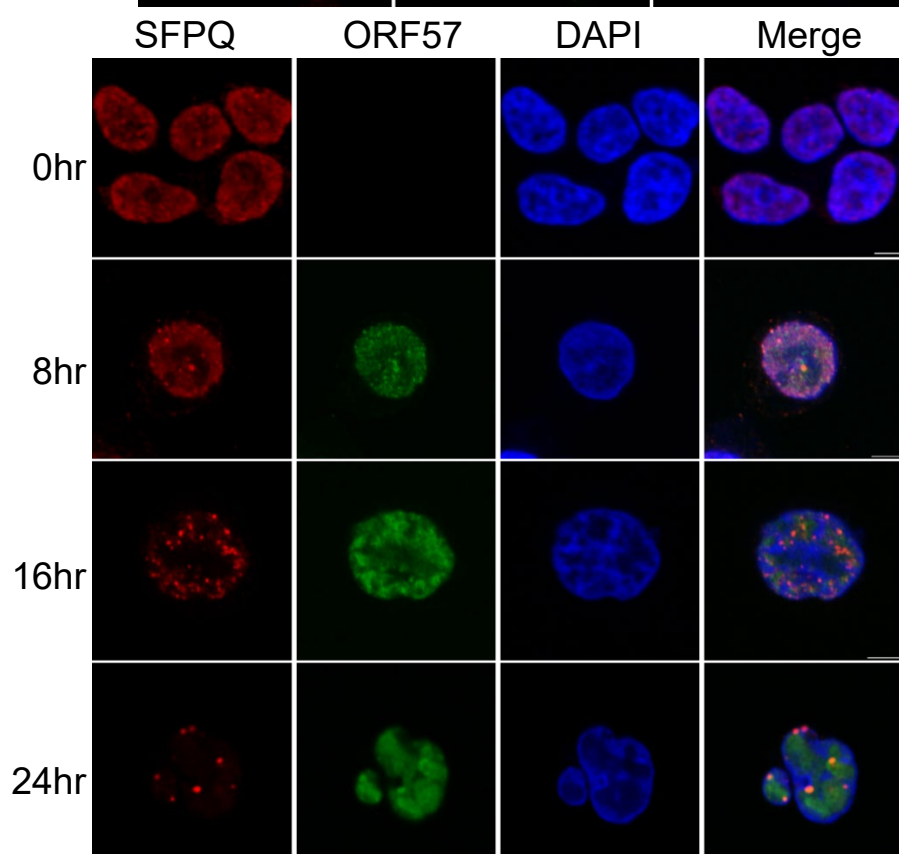

Figure S2 (F-L)

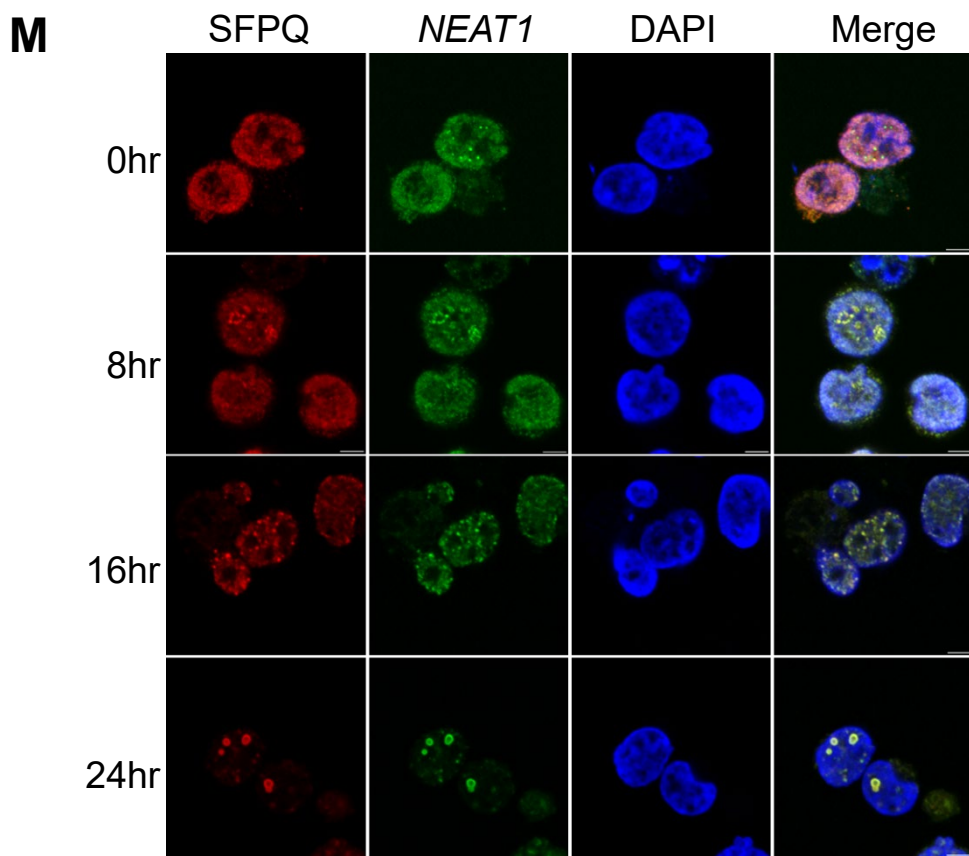

**N** **O**

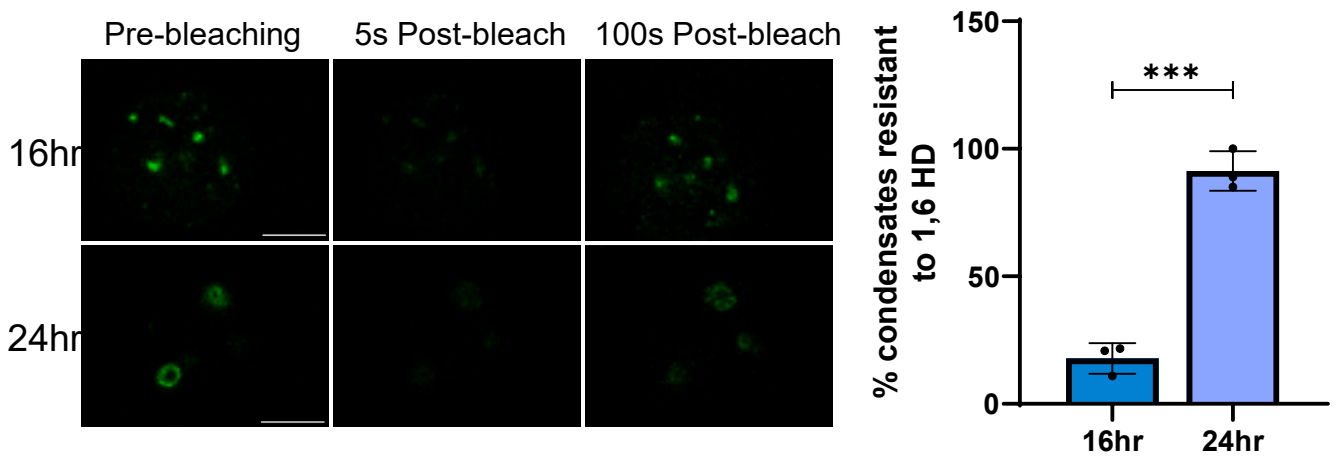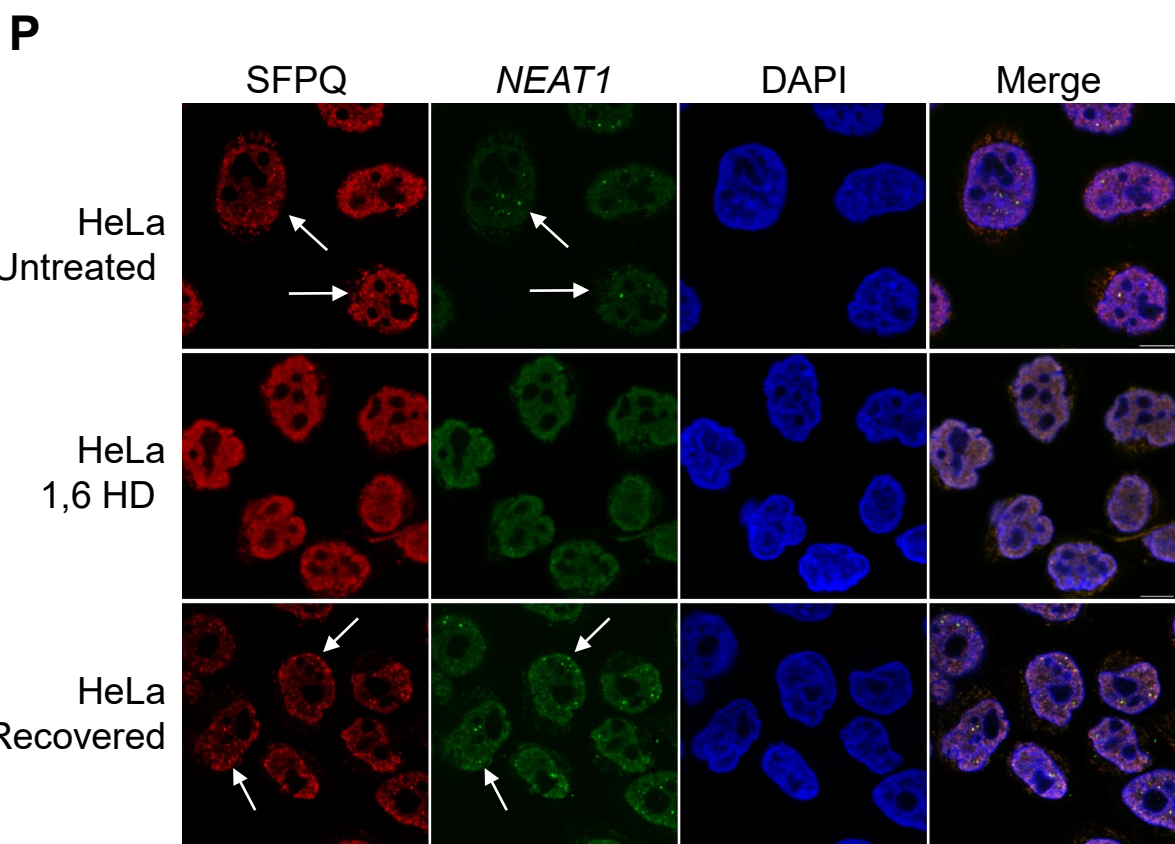

Figure S2 (M-P)

**Figure S2:**

- (A).** IF of latent TREx or HeLa cells with staining for SFPQ (red), *NEAT1* (green) and DAPI (blue). Arrows highlight the canonical paraspeckles.
- (B).** IF of TREx at 0 and 24 hours with staining for SFPQ (red), NONO (green) and DAPI (blue).
- (C).** Representative blot of co-IP of SFPQ probed with antibodies against SFPQ, PSPC1, NONO and GAPDH (n=3).
- (D).** IF of TREx at 0 and 24 hours with staining for SFPQ (red), FUS (green) and DAPI (blue) with intensity analysis performed by Zen Blue (left). IF of TREx at 0 and 24 hours with staining for FUS (red), RNA pol II (green) and DAPI (blue) with intensity analysis performed by Zen Blue (right).
- (E).** Representative composite western blot of SFPQ co-IP in TREx at 0 and 24 hours with antibodies against SFPQ, FUS and GAPDH. n=3.
- (F).** qPCR of *FUS* in scr and FUS KD TREx cells at 0 and 24 hours. GAPDH was used as a housekeeper, n=3. P values are <0.0001 and 0.0012.
- (G).** Representative western blot for levels of FUS in scr and FUS KD TREx cells at 0, 24 and 48 hours post-lytic induction. GAPDH was used as a loading control, densitometry analysis was performed on n=3. P values are <0.0001, <0.0001 and 0.0001.
- (H).** IF of scrambled and FUS KD TREx cells at 24 hours with staining for SFPQ (red), FUS (green) and DAPI (blue).
- (I).** qPCR of *FUS* in scr and FUS KD HeLa cells. P value is <0.0001.
- (J).** Representative western blot for levels of FUS in scr and FUS KD HeLa cells. GAPDH was used as a loading control, densitometry analysis was performed on n=3. P value is <0.0001.
- (K).** IF of FUS KD HeLa cells with staining for SFPQ (red), *NEAT1* (green) and DAPI (blue).
- (L).** IF of TREx cells at 0, 8, 16 and 24 hours with SFPQ (red), DAPI (blue) staining and ORF57 (green).
- (M).** IF of TREx cells at 0, 8, 16 and 24 hours with SFPQ (red), DAPI (blue) staining and *NEAT1* (green).
- (N).** FRAP images of GFP-SFPQ O/E TREx cells at 16 and 24 hours post-reactivation. Images were taken 5 seconds pre-bleaching, 5 seconds post-bleaching and 100 seconds post-bleaching.
- (O).** Percentage of reactivated cells with v-mPS resistant to 1,6-hexanediol treatment at 16 and 24 hours post reactivation. For each biological repeat, 20 cells were counted. N=3. P value is 0.0002.
- (P).** IF of HeLa cells stained for SFPQ (red), *NEAT1* (green) and DAPI (blue). Cells were untreated (row 1), 1,6 HD treated (row 2), or 1,6 HD treated and allowed to recover for 30 minutes (row 3). White arrows are used to highlight paraspeckles in untreated and recovered cells.

Scale bars are 5  $\mu$ m except in K, P (10  $\mu$ m),. All repeats are biological. In F-J, O data are presented as mean  $\pm$  SD. Unpaired two-tailed student T-test. \*P < 0.05, \*\*P < 0.01 and \*\*\*P < 0.001



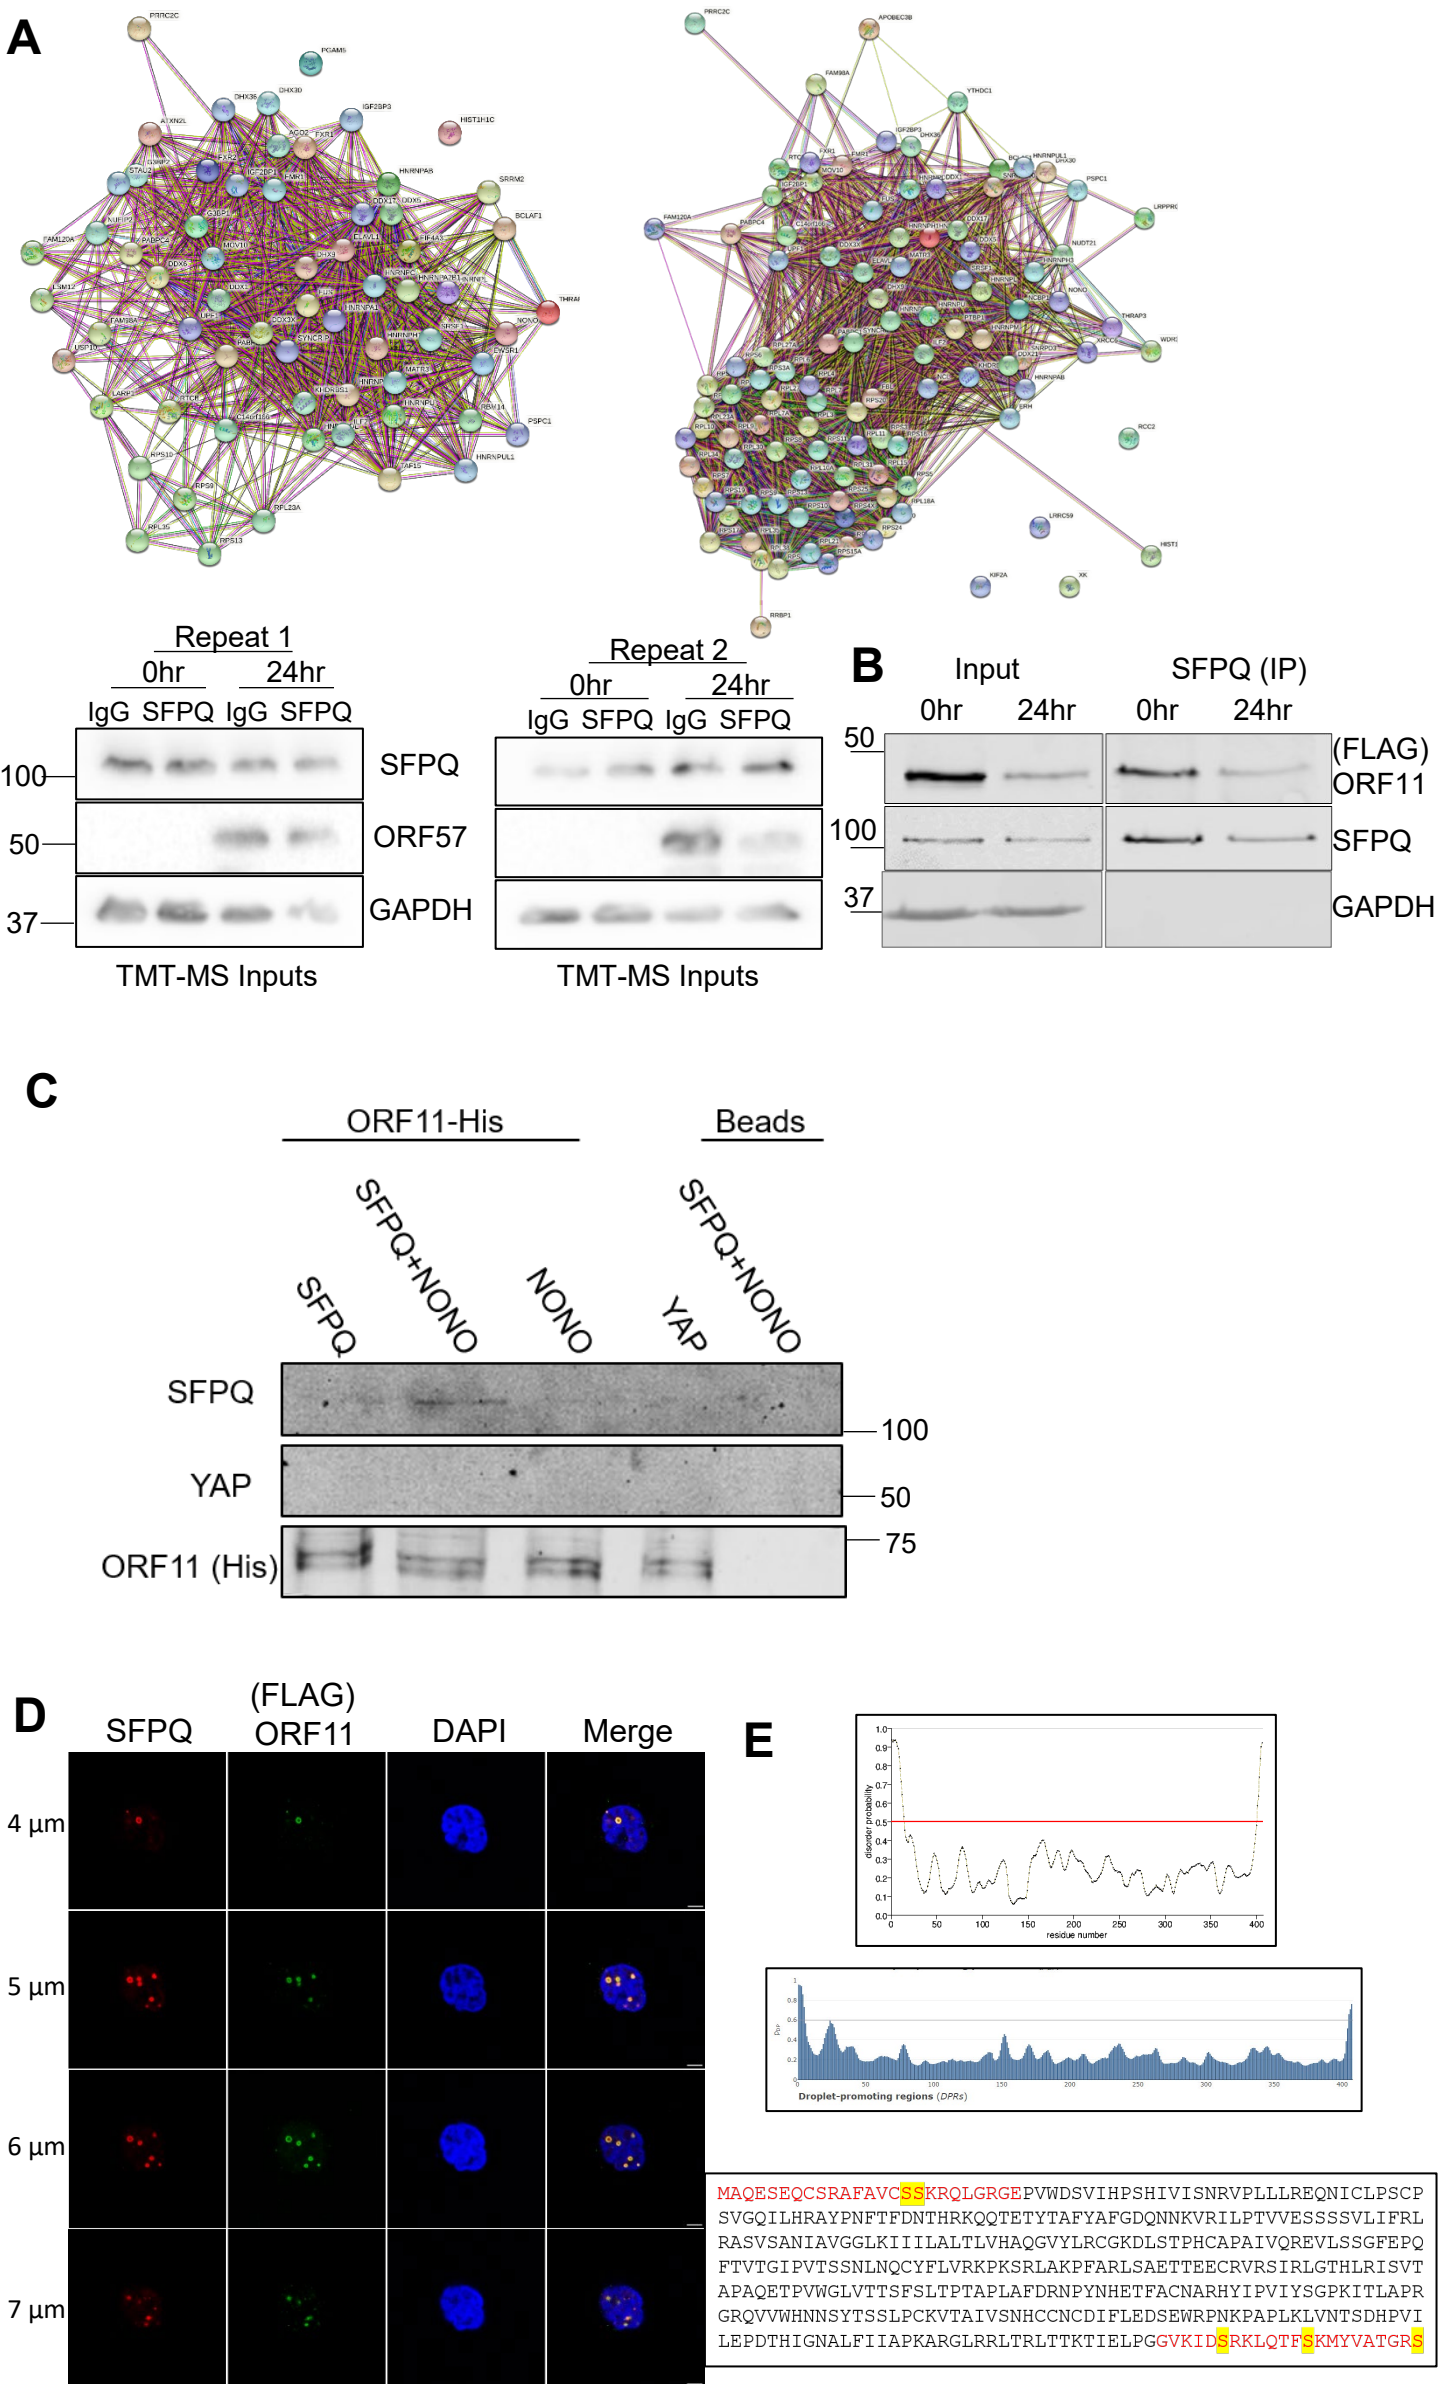

Figure S3(A-E)



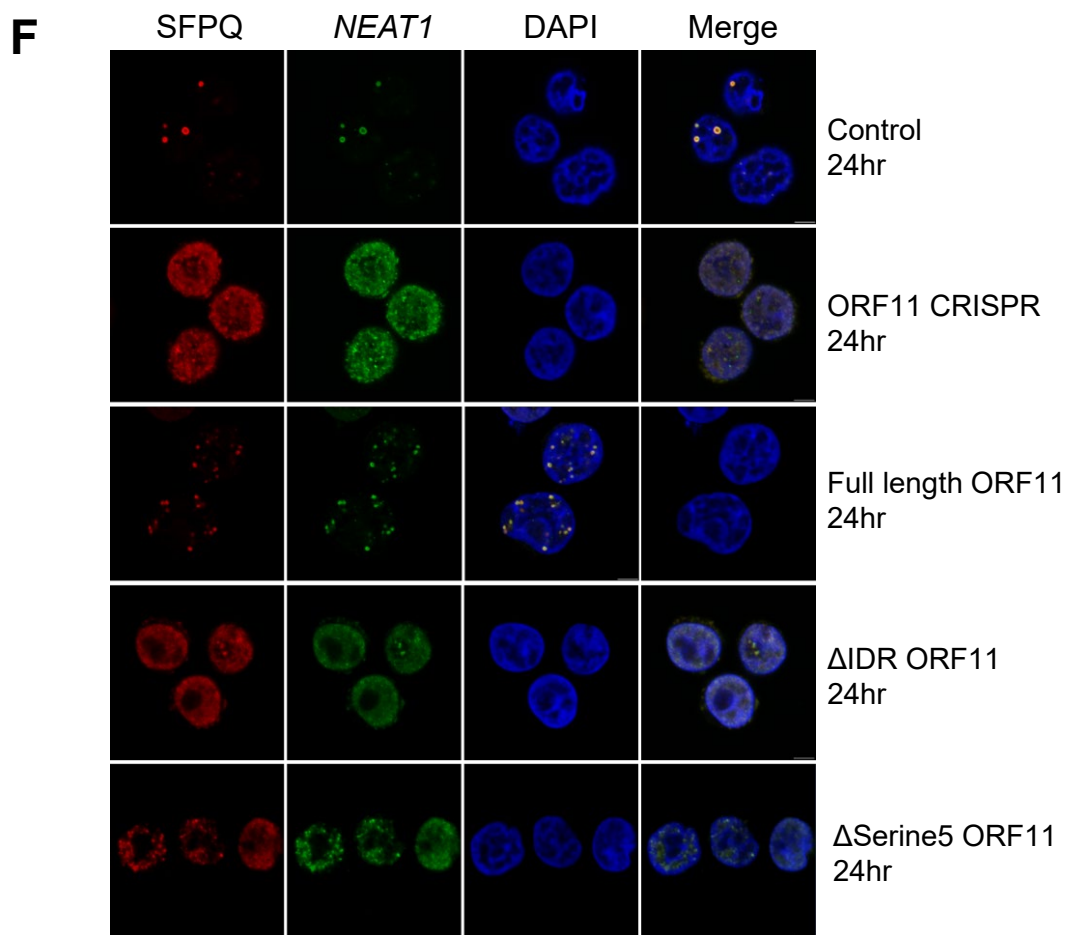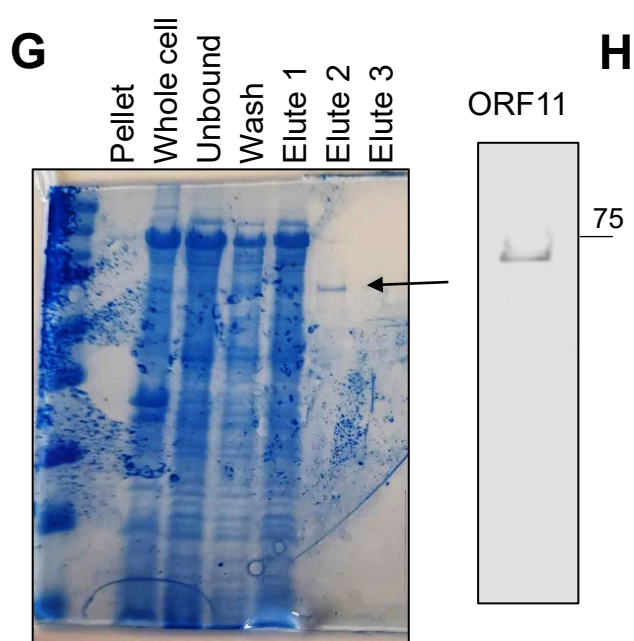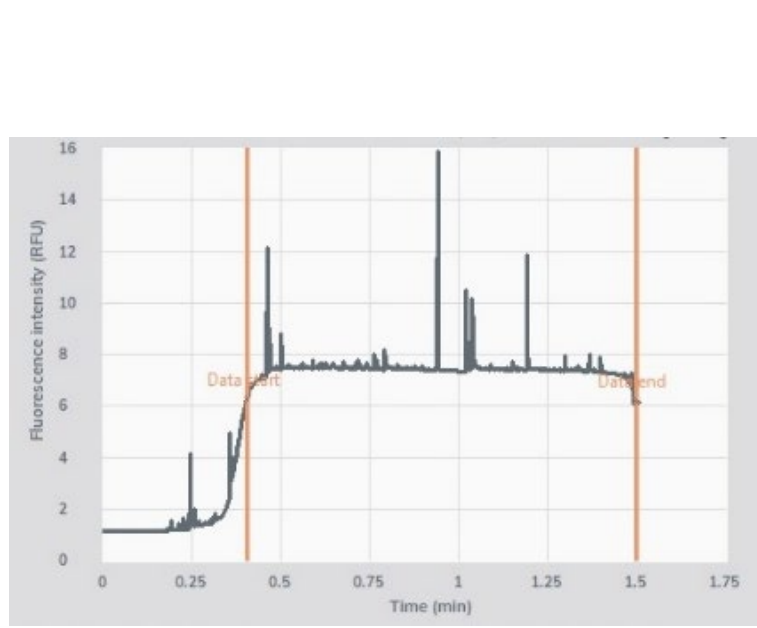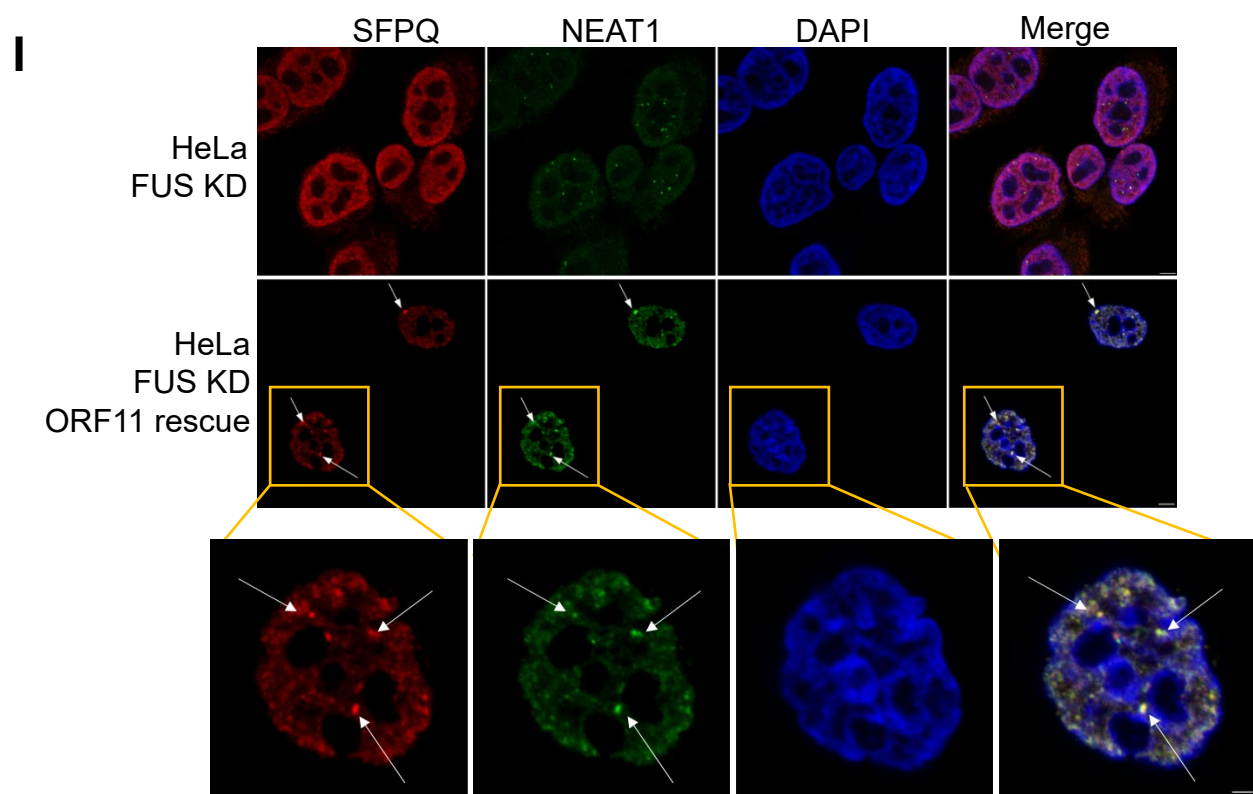

Figure S3(F-I)

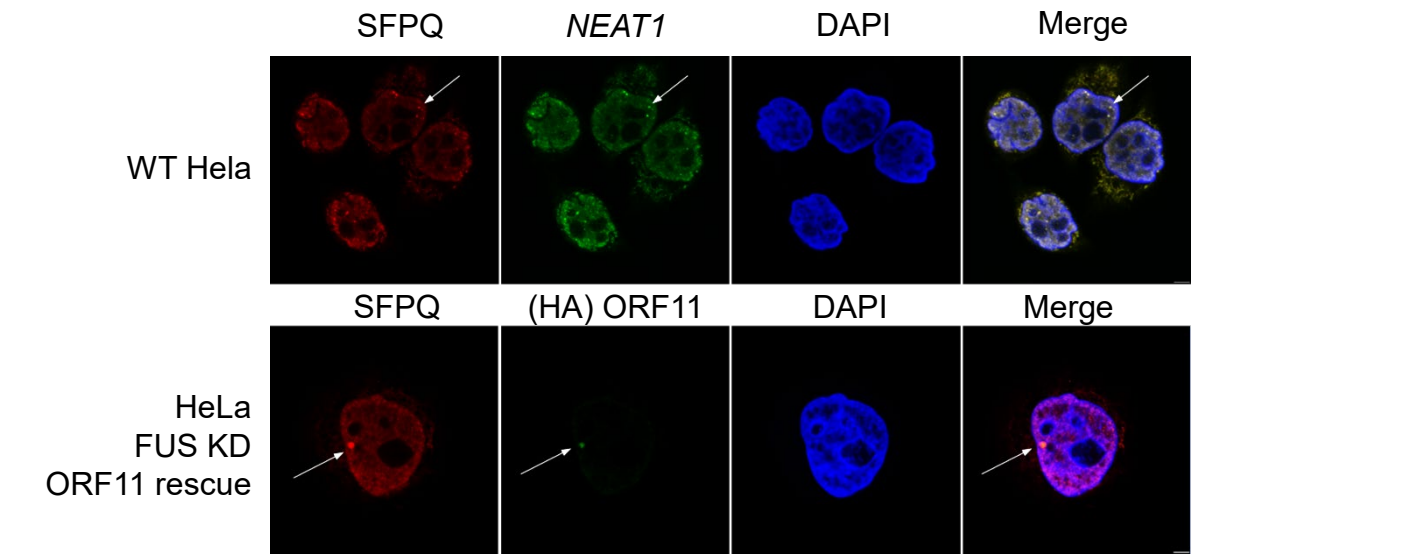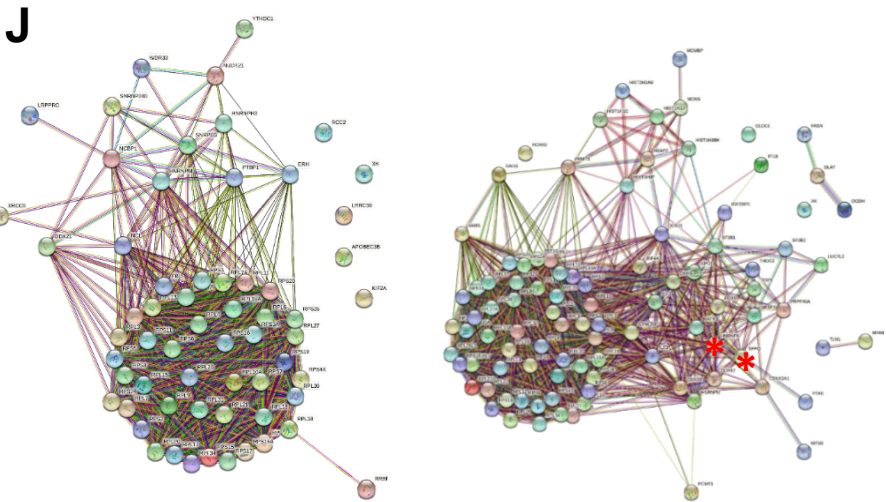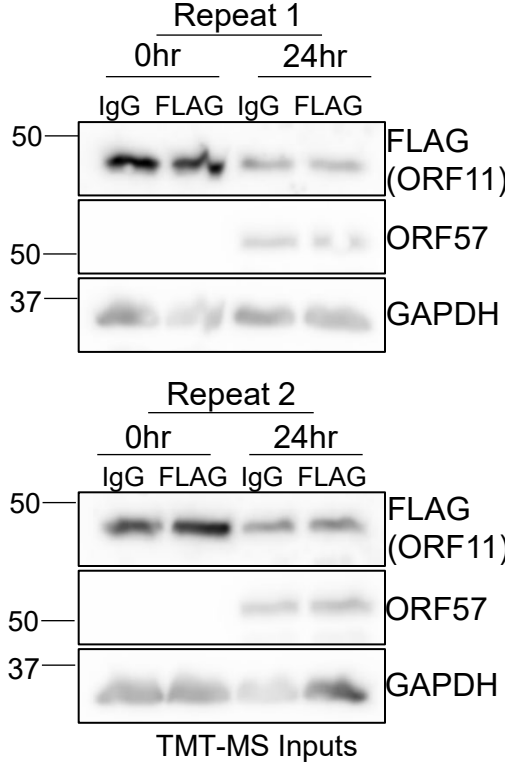

| DEAD/DEAH box helicases | hnRNPs     | Other RNA processing factors |
|-------------------------|------------|------------------------------|
| DDX1                    | hnRNP A1   | ADAR                         |
| DDX17                   | hnRNP A2B1 | APOBEC3B                     |
| DDX21                   | hnRNP AB   | ELAV1                        |
| DDX3X                   | hnRNP C    | ERH                          |
| DDX5                    | hnRNP D    | FAM98A                       |
| DHX30                   | hnRNP DL   | FBL                          |
| DHX36                   | hnRNP H1   | FMR1                         |
| DHX9                    | hnRNP H3   | IGF2BP3                      |
|                         | hnRNP K    | LUC7L2                       |
|                         | hnRNP L    | MOV10                        |
|                         | hnRNP M    | NCL                          |
|                         | hnRNP Q    | PABPC1                       |
|                         | hnRNP R    | PABPC4                       |
|                         | hnRNP U    | PRPF40A                      |
|                         | hnRNP UL1  | PTBP1                        |
|                         |            | RARS1                        |
|                         |            | RTCB                         |
|                         |            | RTRAF                        |
|                         |            | SF3BP                        |
|                         |            | SNRNP200                     |
|                         |            | SNRPA                        |
|                         |            | SNRPD3                       |
|                         |            | SRSF1                        |
|                         |            | UPF1                         |
|                         |            | VARS1                        |
|                         |            | WDR33                        |
|                         |            | YTHDC1                       |

Figure S3(I-K)

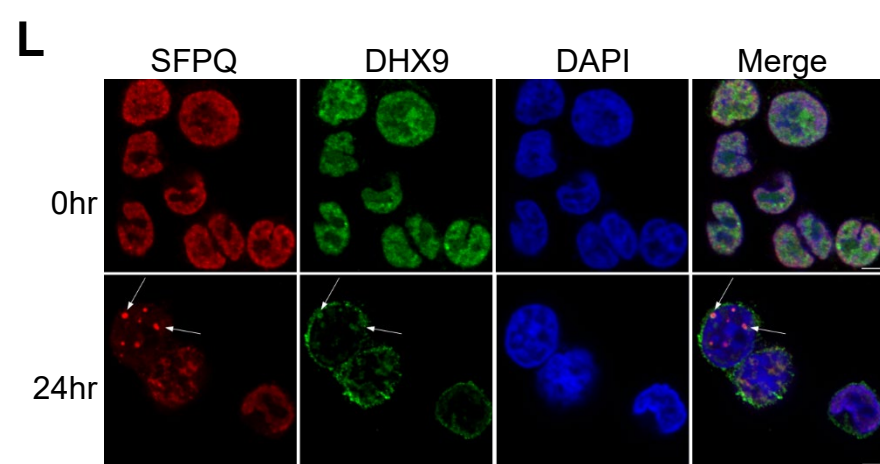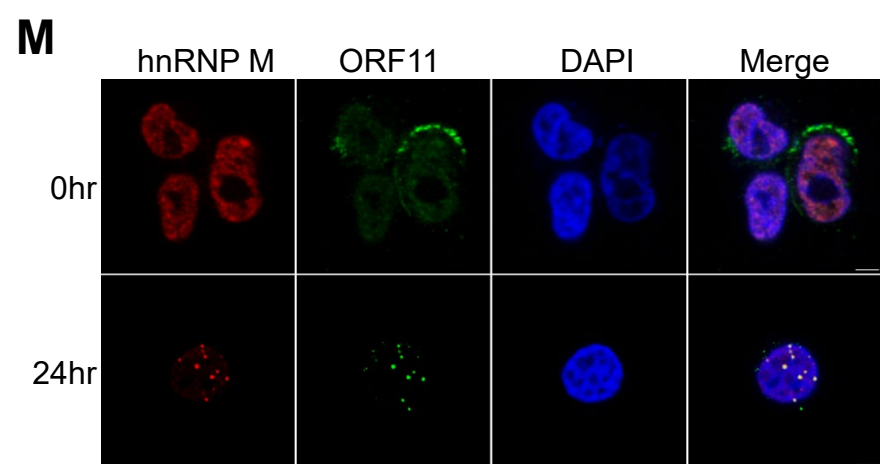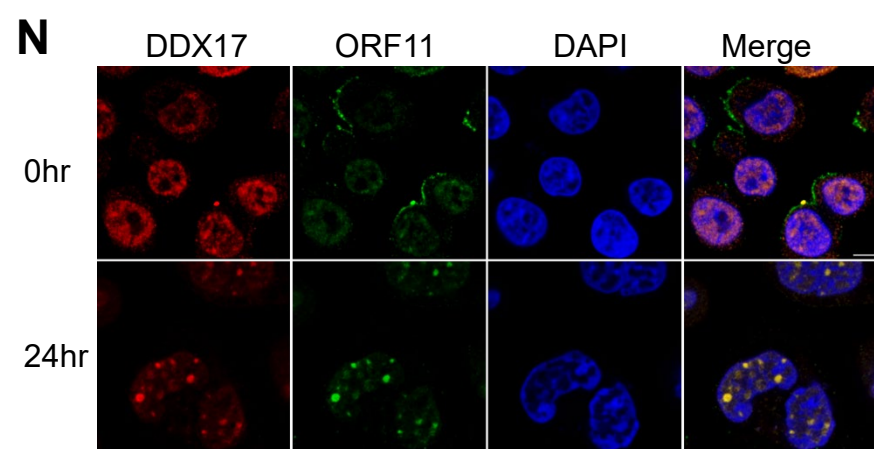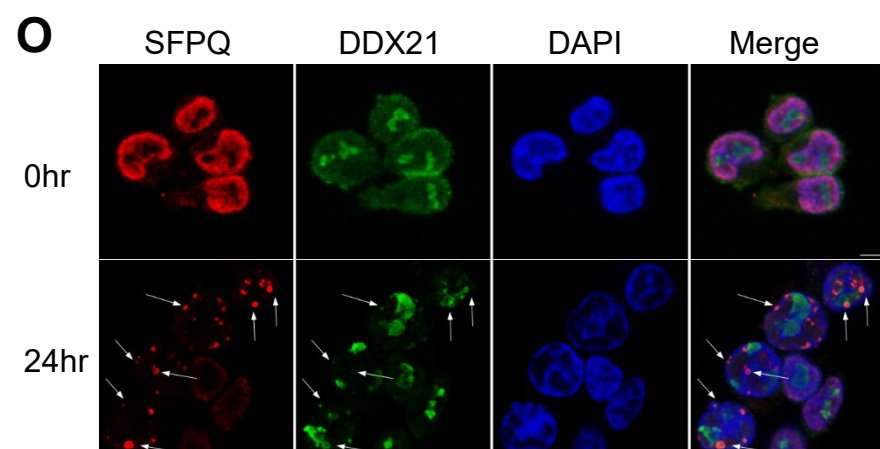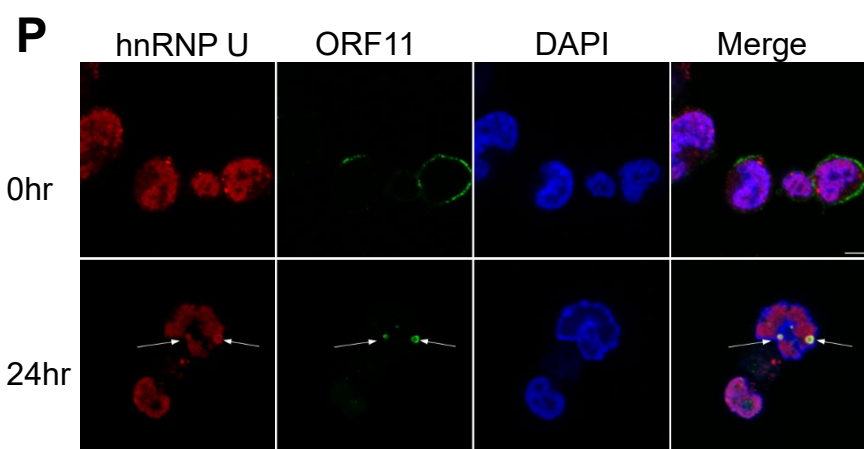

Figure S3(L-P)

**Figure S3:**

- (A).** String analysis of TMT LC-MS/MS of SFPQ Co-IPs in TREx-BCBL1-RTA cells at 0 (left) and 24 hours (right). (n=2). Inputs of the cell lysates used for the Co-IPs were taken and analysed via western blot to confirm presence of SFPQ and lytic replication via ORF57 expression.
- (B).** Representative western blot for SFPQ Co-IPs in FLAG-ORF11-TREx-BCBL1-RTA cells at 0 and 24 hours. Membranes were probed for SFPQ, GAPDH and FLAG (ORF11). N=3.
- (C).** Representative western blot for *in vitro* ORF11 pulldowns. Purified SFPQ, SFPQ and NONO, NONO and YAP was washed over unbound or ORF11 bound beads. Membranes were probed for SFPQ, YAP and ORF11 (his). N=2.
- (D).** IF analysis taken through different z-planes of a cell stained for SFPQ (red) FLAG/ORF11 (green) and DAPI (blue) at 24 hours in TREx FLAG-ORF11 OE cells.
- (E).** Protein disorder prediction for ORF11 using PrDOS software and FuzDrop Software. ORF11 protein sequence with amino acids removed for the truncation mutant in red and putative phosphorylated serine residues highlighted in the IDRs.
- (F).** IF staining of control TREx cells (Row 1), ORF11 CRISPR TREx cells (row 2), full length ORF11 rescue TREx (row 3), truncated ORF11 rescue ( $\Delta$ IDR ORF11) (row 4) or serine mutated ORF11 ( $\Delta$ Serine5 ORF11) (row 5). Staining is for SFPQ (red), DAPI (blue) and *NEAT1* (green). All cells were at 24 hours post-reactivation
- (G).** ORF11 protein purification and expression with coomassie Blue staining (left) and western blot probing for His-ORF11 for further confirmation of protein expression (right).
- (H).** FIDA analysis for ORF11 droplet forming propensity. Signal spikes are observed when ORF11 undergoes phase separation, with each spike signifying a droplet.
- (I).** IF of FUS KD HeLa cells or FUS KD HeLa cells overexpressing HA-ORF11. Stained for SFPQ (red), *NEAT1* (green) and DAPI (blue) (upper row). White arrows indicate co-localisation of SFPQ and *NEAT1*. IF of WT HeLa or FUS KD HA-ORF11 HeLa with staining for SFPQ (red), DAPI (blue) and either *NEAT1* or HA (green). White arrows highlight SFPQ and ORF11 co-localisation
- (J).** String analysis of TMT LC-MS/MS of FLAG (ORF11) Co-IPs in TREx FLAG-ORF11 O/E cells. (n=2) at 0 (left) and 24 hours (right). Inputs were analysed via western blot to confirm presence of FLAG-ORF11 and lytic replication. \* denotes proteins of interest
- (K).** Table highlighting proteins of interest within the SFPQ and/or FLAG-ORF11 TMT-MS at 24 hours. Proteins are divided into DEAD/DEAH box helicases, hnRNPs or other known RNA processing factors.
- (L-P)** IF analysis of some of the TMT-MS enriched targets at 0 and 24 hours in TREx or TREx FLAG-ORF11 O/E cells with staining for **(L)** SFPQ (red) and DHX9 (green), **(M)** hnRNP M (red) and FLAG/ORF11 (green), **(N)**, DDX17 (red) and FLAG/ORF11 (green), **(O)** SFPQ (red) and DDX21 (green) **(P)** hnRNP U (red) and FLAG/ORF11 (green). All cells stained DAPI (blue). White arrows are used to highlight condensates.

Scale bars are 5  $\mu$ m in length, except for zoom I where scale bar represents 2  $\mu$ m.

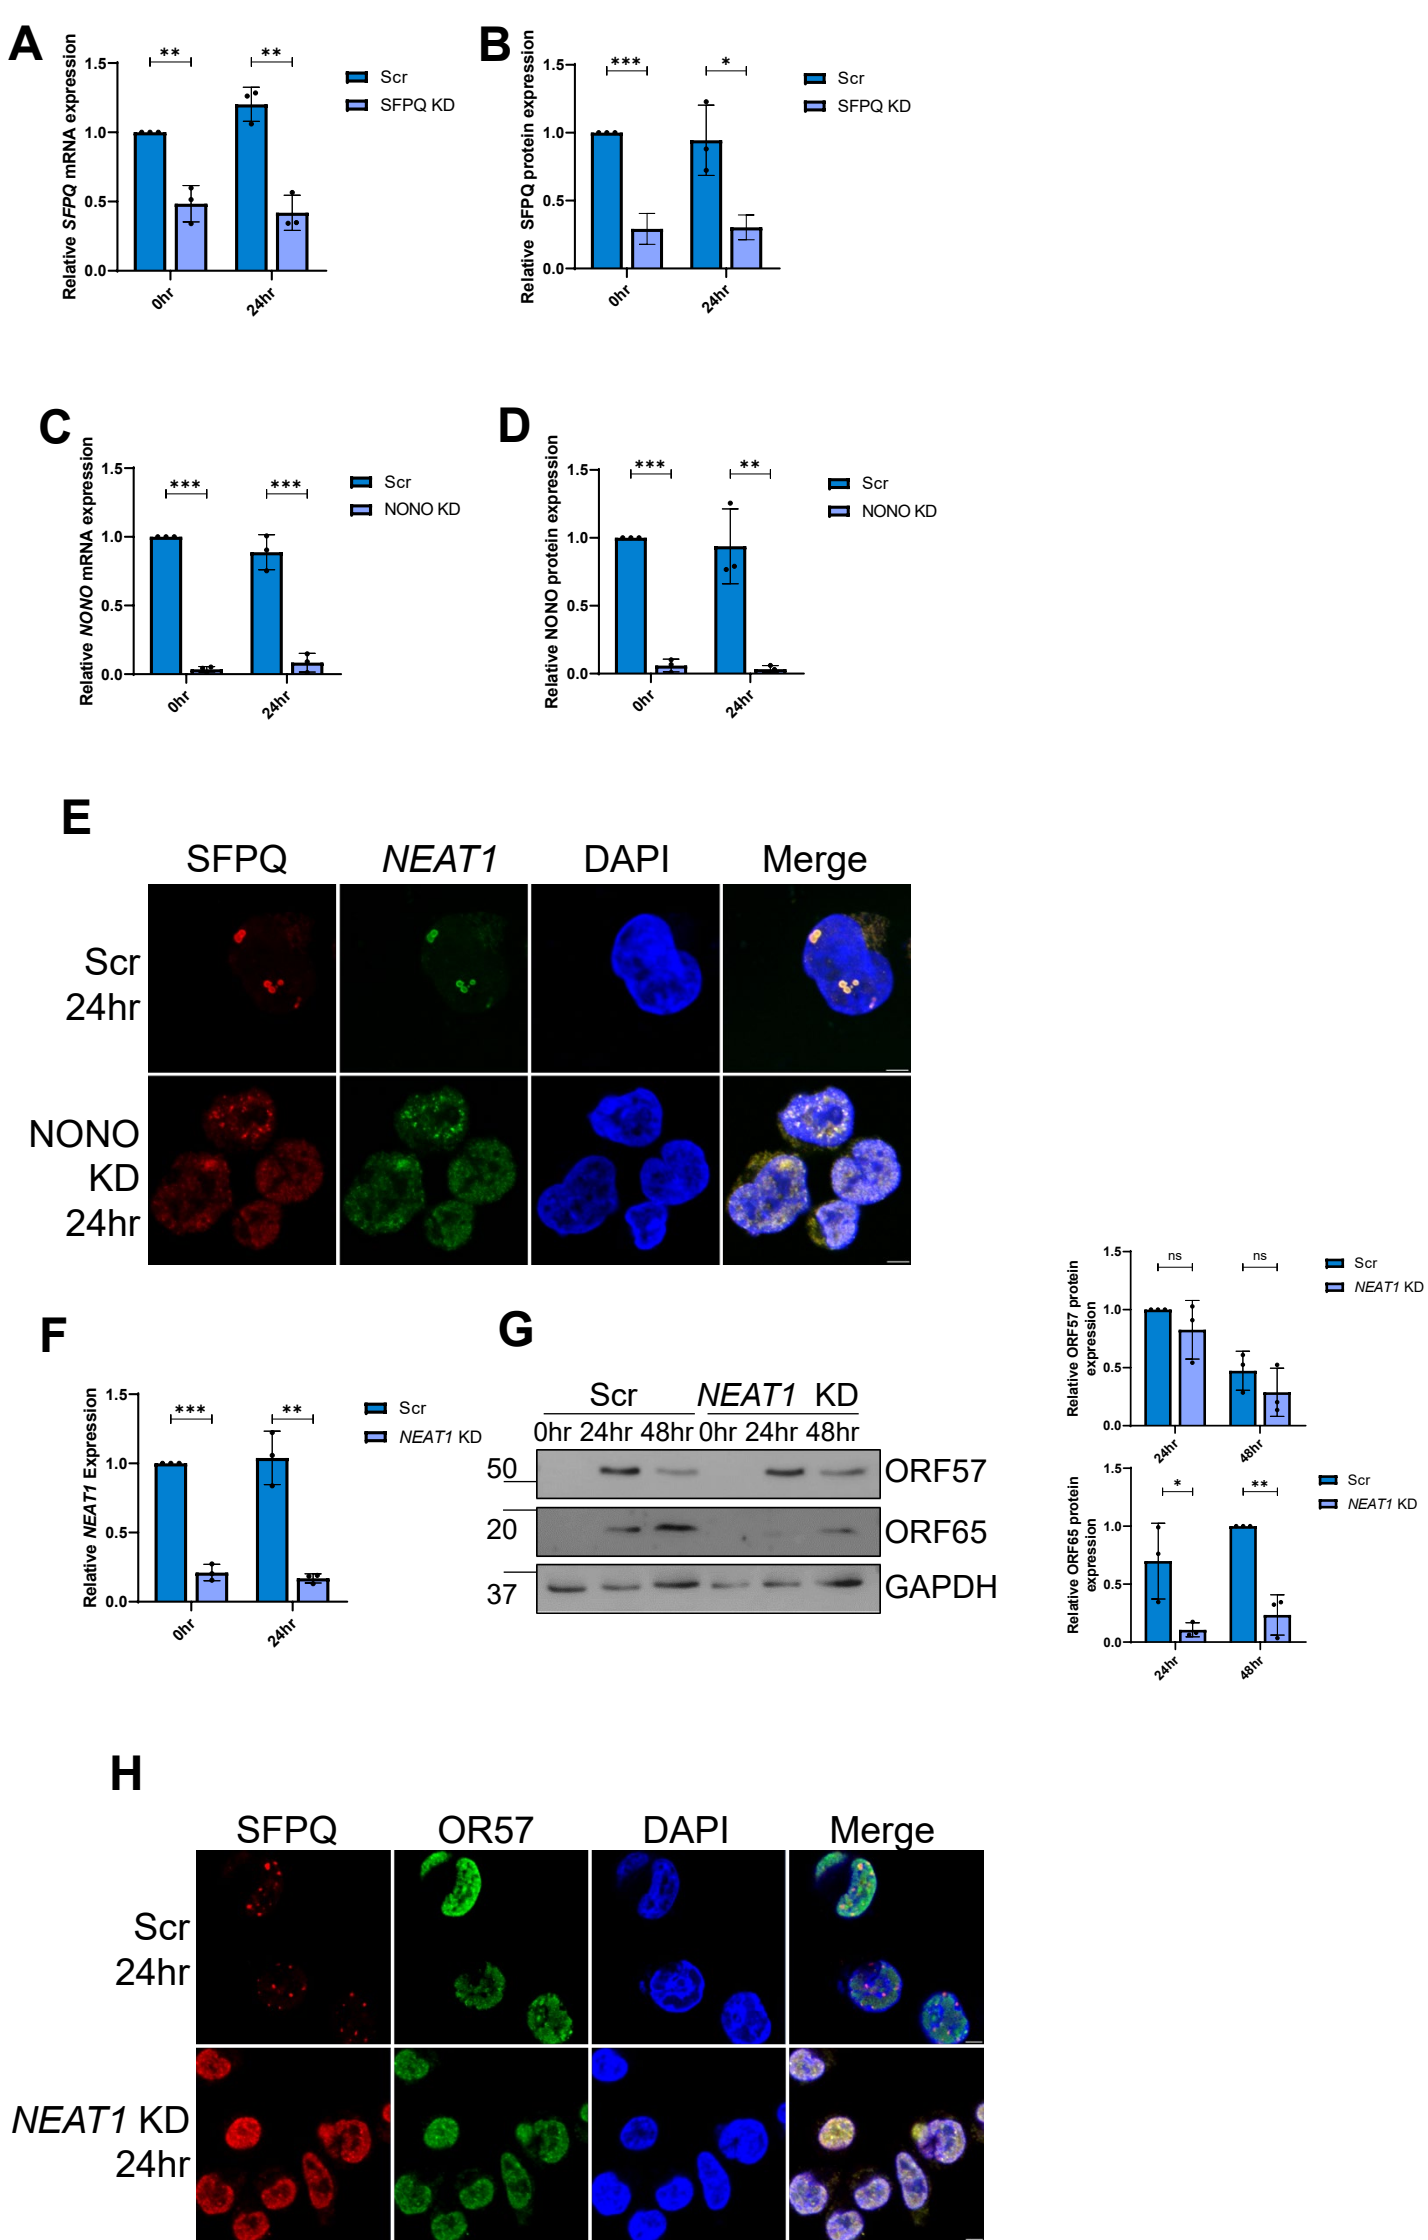

Figure S4(A-H)

#### Figure S4.

**(A).** qPCR analysis of *SFPQ* levels at 0 and 24 hours in TREx scr and SFPQ KD cells. GAPDH was used as a housekeeper (n=3). P values are 0.0025 and 0.0016.

**(B).** Densitometry analysis of SFPQ protein levels in 0 and 24 hours in scr and SFPQ KD TREx cells (n=3). P values are 0.0004 and 0.0155.

**(C).** qPCR analysis of *NONO* levels in scr and NONO KD TREx cells at 0 and 24 hours. GAPDH was used as a housekeeper. (n=3). P values are <0.0001 and 0.0007.

**(D).** Densitometry analysis of NONO protein levels in 0 and 24 hours in scr and NONO KD TREx cells (n=3). P values are <0.0001 and 0.0048

**(E).** IF in scr or NONO KD TREx cells with staining against SFPQ (red), *NEAT1* (green) and DAPI (blue).

**(F).** qPCR analysis of *NEAT1* levels in scr or GapmeR treated TREx cells at 0 or 24 hours. GAPDH was used as a housekeeper, n=3. P values are <0.0001 and 0.0015.

**(G).** Representative western blot of ORF57 and ORF65 in scrambled and *NEAT1* GapmeR treated TREx at 0, 24 hours and 48 hours. GAPDH was used a loading control. Densitometry analysis on n=3. ORF57 P values are 0.3008 and 0.2945. ORF65 p values are 0.0367 and 0.0016.

**(H).** IF analysis of scrambled and *NEAT1* GapmeR treated TREx at 24 hours with staining for SFPQ (red), ORF57 (green) and DAPI (blue).

Scale bars 5  $\mu$ m. All repeats are biological. In A-D, F-G data are presented as mean  $\pm$  SD. \*P < 0.05, \*\*P < 0.01 and \*\*\*P < 0.001 (unpaired two-tailed Student's t-test).



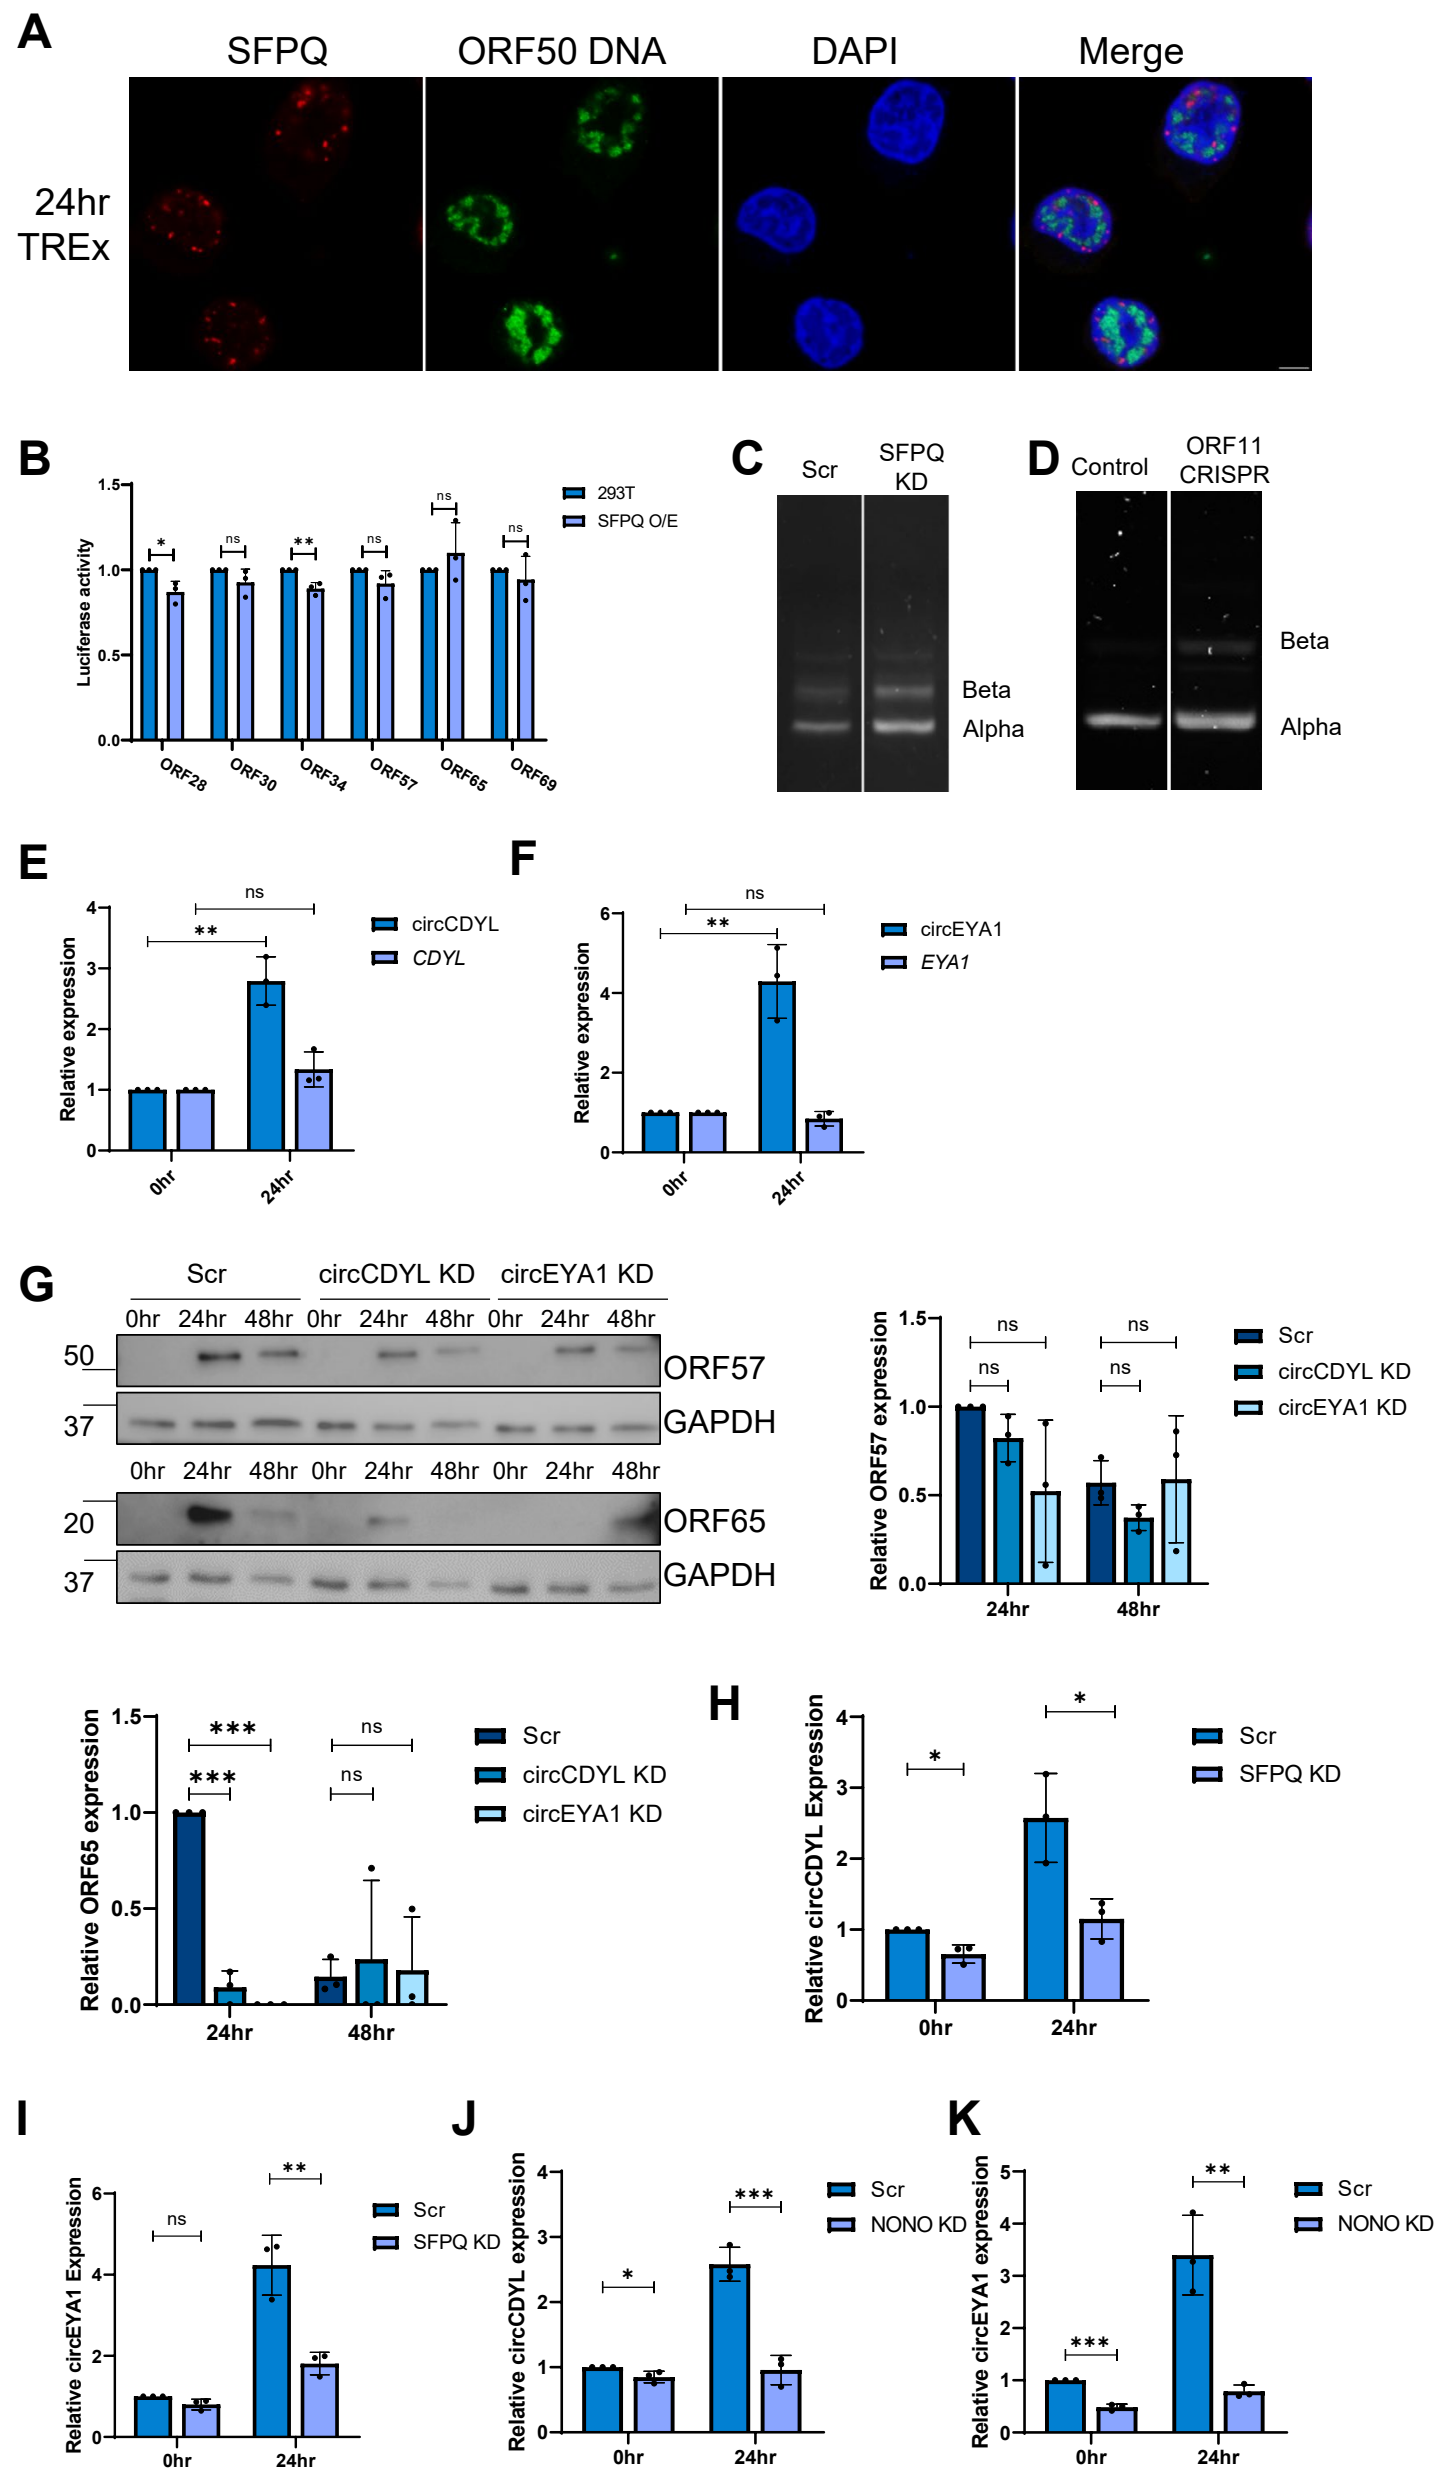

Figure S5(A-K)

**Figure S5.**

**(A).** IF in TREx cells at 24 hours with staining against SFPQ (red), ORF50 DNA (green) and DAPI (blue).

**(B).** Dual-luciferase reporter constructs containing viral 5' UTRs were transfected into HEK-293T and SFPQ-GFP OE cells and relative renilla luciferase activity was measured. The firefly luciferase activity was used as a transfection control, n=3. P values are 0.0226, 0.1773, 0.0062, 0.1417, 0.3830 and 0.5119.

**(C-D).** Representative Agarose gels for *K8* splicing assays for alpha and beta variant, for scr vs SFPQ KD TREx (C) and control vs ORF11 CRISPR cells (D).

**(E).** qPCR of circCDYL and *CDYL* levels at 0 and 24 hours in TREx, GAPDH was used as a housekeeper, n=3. P values are 0.0015 and 0.1125.

**(F).** qPCR of circEYA1 and *EYA1* levels at 0 and 24 hours in TREx cells, GAPDH was used as a housekeeper, n=3. P values are 0.0035 and 0.2198.

**(G).** Representative western blot of ORF57 and ORF65 levels in scrambled, circCDYL KD and circEYA1 KD TREx cells at 0, 24 and 48 hours. GAPDH was used as a loading control. Densitometry analysis was performed on n=3 for ORF57 and ORF65. P values are 0.6047, 0.0929, 0.4910 and 0.9914 for ORF57 and <0.00001, <0.0001, 0.8993 and 0.9844 for ORF65.

**(H-I).** qPCR of circCDYL and circEYA1 in scrambled and SFPQ KD TREx cells at 0 and 24 hours. GAPDH was used as a housekeeper. N=3. P values are 0.0100 and 0.0232 in H. P values are 0.0595 and 0.0059 in I.

**(J-K).** qPCR of circCDYL and circEYA1 in scrambled and NONO KD TREx cells at 0 and 24 hours. GAPDH was used as a housekeeper. N=3. P values are 0.0415 and 0.0012 in J. P values are 0.0001 and 0.0043 in K.

All repeats are biological. Scale bar represents 5  $\mu$ m in A. In B, E-K data are presented as mean  $\pm$  SD. \*P < 0.05, \*\*P < 0.01 and \*\*\*P < 0.001. Unpaired two-tailed Student's t-test was used for B, E-F, H and a one-way ANOVA was performed for G.

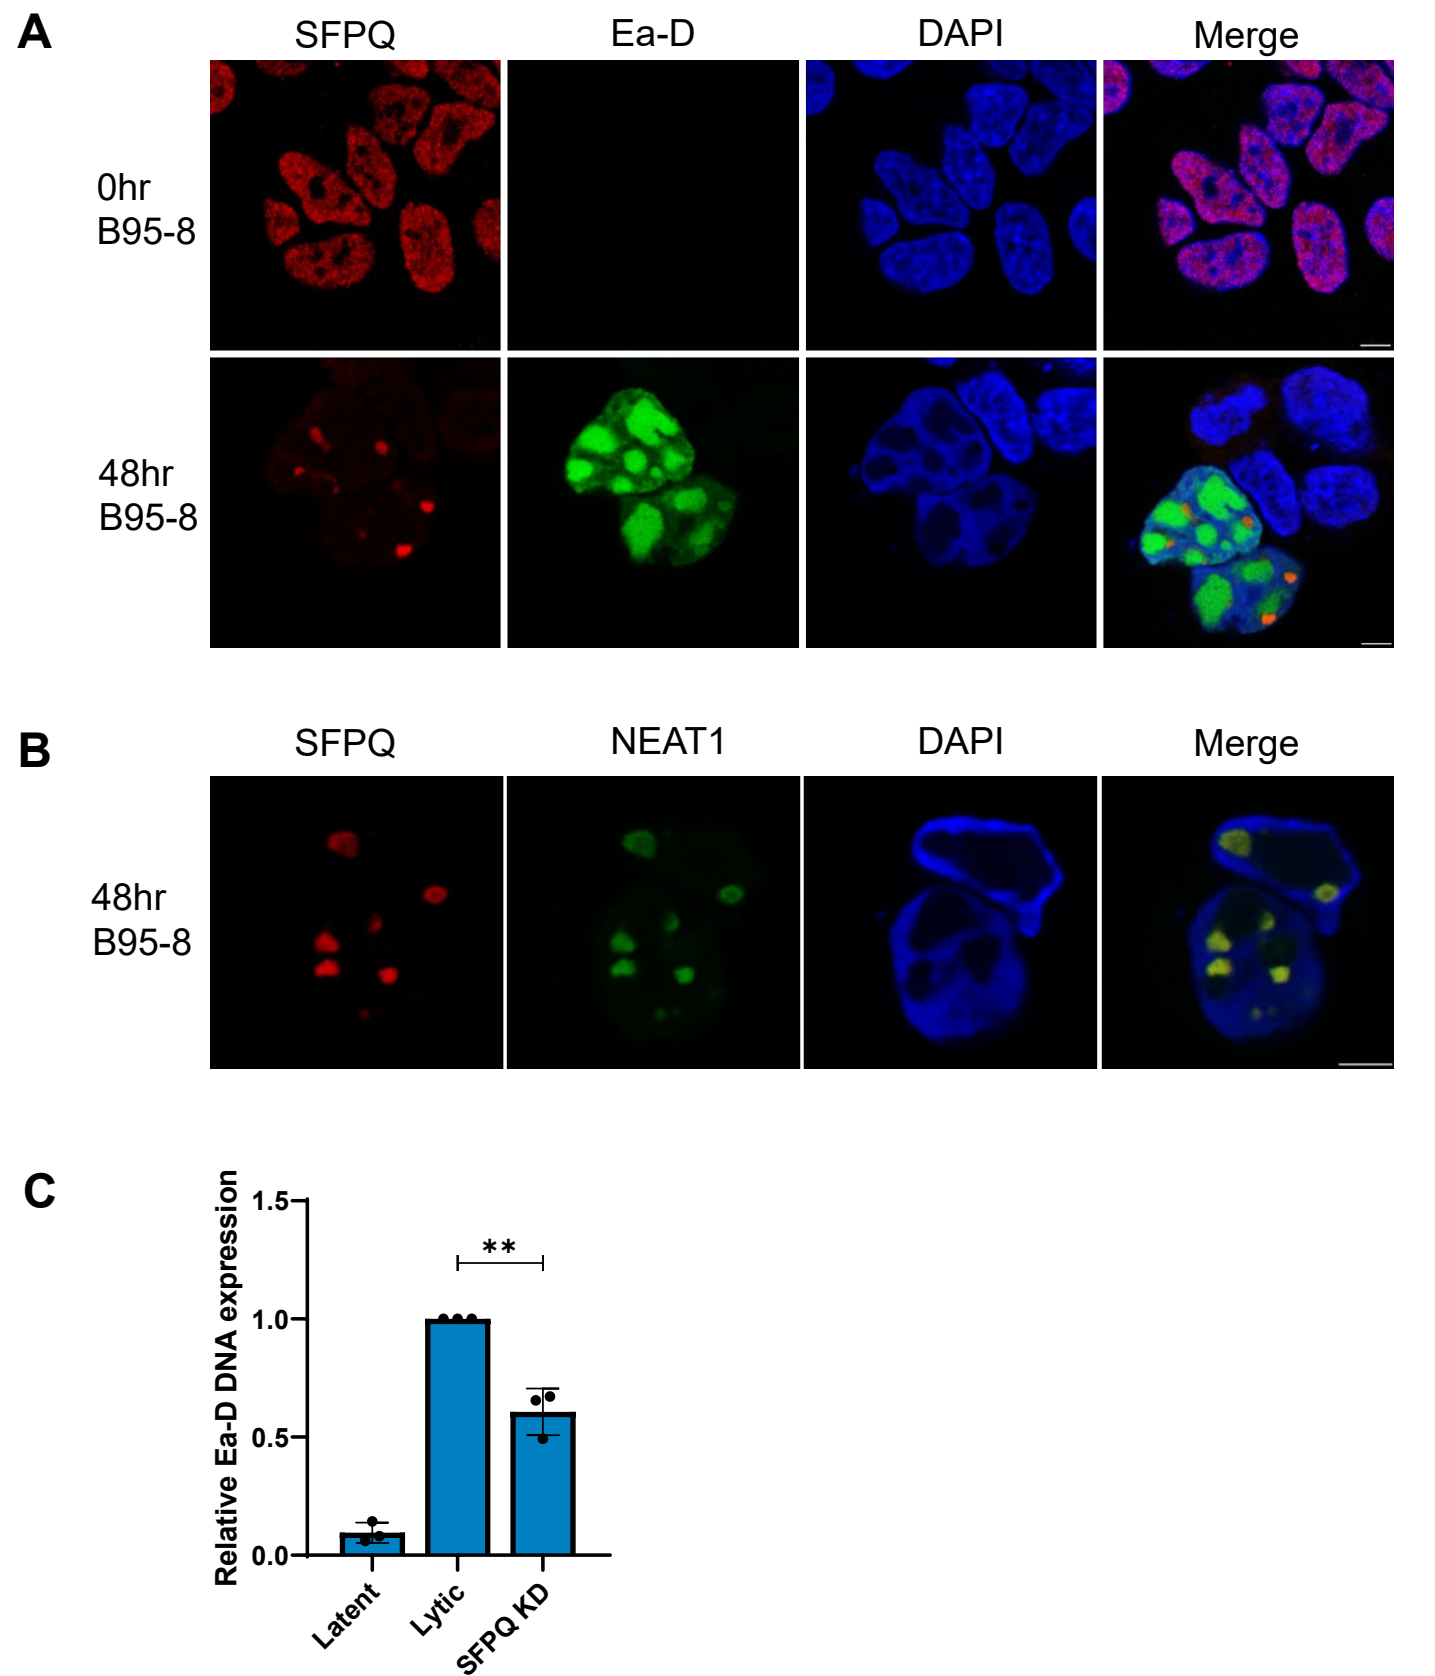

**Figure S6.**

**(A).** IF of 0 or 48 hour reactivated 293-SL-HB9-862-L1 Cells stained for SFPQ (red), Ea-D (green) and DAPI (blue).

**(B).** IF of 48 hour reactivated 293-SL-HB9-862-L1 Cells stained for SFPQ (red), *NEAT1* (green) and DAPI (blue).

**(C).** qPCR analysis of Ea-D DNA levels for viral load at 72 hr post-EBV induction, with scr and SFPQ KD 293-rJJ-L3 cells including uninduced cells as a reactivation control and GAPDH as a housekeeper (n = 3). P value is 0.0023.

In C data are presented as mean ± SD. \*P < 0.05, \*\*P < 0.01 and \*\*\*P < 0.001. Unpaired two-tailed Student's t-test was used for C. Scale bars are 5 µm.

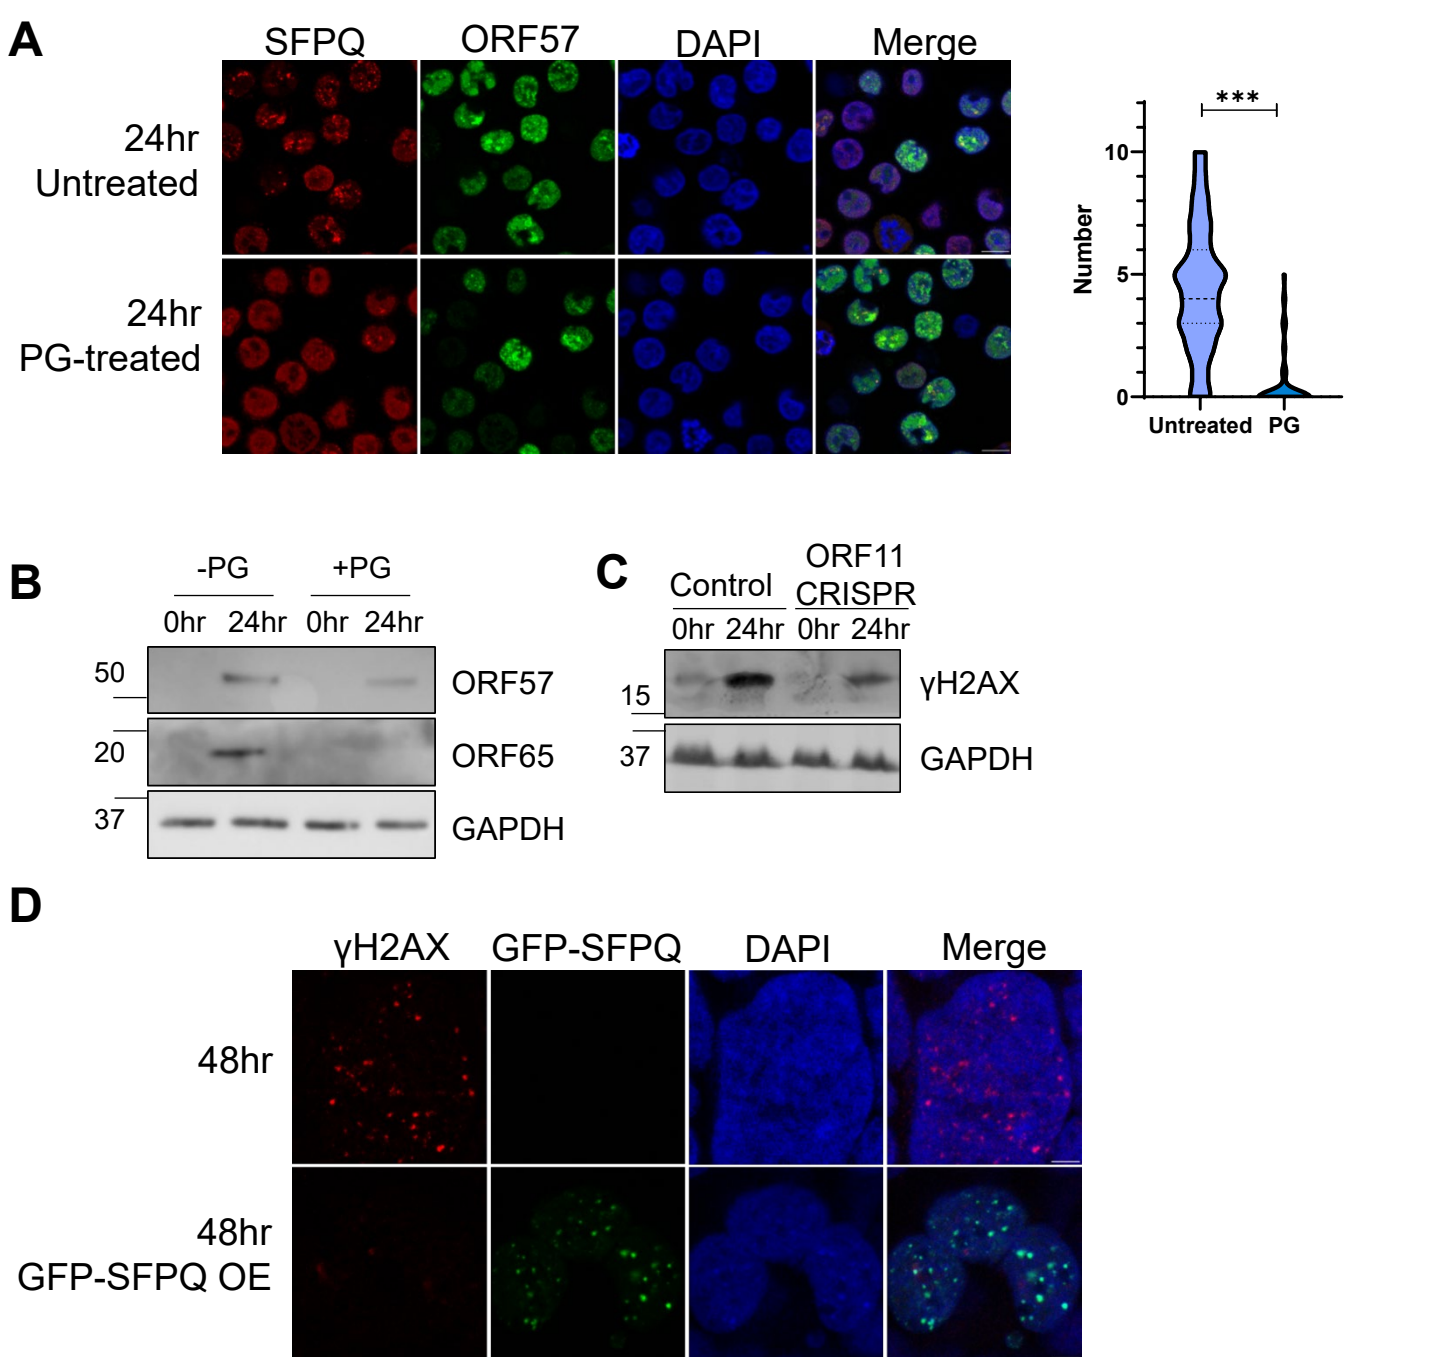

**Figure S7.**

**(A).** IF of untreated or 8 hour PG treated TREx cells. Cells were reactivated for 24 hours, with PG added at 16 hours post-lytic induction. Cells stained for SFPQ (red), ORF57 (green) and DAPI (blue). Number of v-mPS per cell were quantified in untreated and PG treated cells at 24 hours. 100 individual cells were counted per condition. P value is <0.0001.

**(B).** Representative western blot of ORF57 and ORF65 protein levels in PG treated TREx cells at 0 and 24 hours. GAPDH was used as a loading control, n=3.

**(C).** Representative western blot of γH2AX at 0 and 24 hours in control and ORF11 CRISPR cells. GAPDH was used as a loading control, n=3.

**(D).** IF of rJJ-L3-#1 at 48 hours either positive or negative for GFP-SFPQ OE. Cells were stained for γH2AX (red) and DAPI (blue).

Scale bars are 10 μm in A and 5 μm in D. Unpaired two-tailed Student's t-test was used for A. All repeats are biological.

| Primer     | Forward                  | Reverse                    |
|------------|--------------------------|----------------------------|
| GAPDH      | TGTCAGTGGTGGACCTGA       | GTGGTCCTTGAGGGCAATG        |
| ORF57      | GCCATAATCAAGCGTACTGG     | GCAGAGAAATATTGCGGTGT       |
| K8         | AGGACCACACATTTGCAAC      | ACCCCTTGTCAGTTCTTC         |
| PAN        | ATAGGCGACAAAGTGAGGTGGCAT | TAACATTGAAAAGAGCGCTCCCAGC  |
| ORF59      | GGTCCGGATATGCTCCTAGTT    | CAGCATGCTCACGAGGAATA       |
| ORF8       | CTACTTCATCACCCGCAACG     | TCCAGGTCAAACACGCTACT       |
| ORF9       | CGTTTACCACCGAGCTAAGC     | TGTCGAAGTACAGGTCCACC       |
| ORF10      | GGACCTCCTGACATTGAGT      | AGGGGTTGTTATGAGGGGTG       |
| ORF65      | AAGGTGAGAGACCCCGTGAT     | TCCAGGGTATTCATGCGAGC       |
| Ea-D       | CTAGCCGTCCTGTCCAAGTGC    | AGCCAAACGCTCCTTGCCCA       |
| SFPQ       | ACAGGGAAAAGGCATTGTTGA    | TCATCTAGTTGTTCAAGTGGTTCC   |
| NONO       | TGATGAAGAGGGGACTTCCAGA   | AGCGCATGGCATATTCATACT      |
| NEAT1      | AGTACCCTGAGAGCCAGTATTGGT | GGCAGCTGAGTCAATCTCCTTT     |
| circPAN    | ACCAGACGGCAAGGTTTTA      | TCGTTAGTCAACCTAGCAAAACA    |
| circvIRF4  | CTCCGTGTGGATACCACTGA     | TGGTCCCACGCAACAGTCT        |
| vIRF4      | CCCAACAGGCCAGCTACATAA    | CTTCGTGGAActCTGAGACGC      |
| EYA1       | GAGCTGATGGCTCCGAGTTT     | GCTATGCGGGCTGGTTAGAT       |
| circEYA1   | TTGCTTACTGGGTCCTACGC     | TACTGCTCCCAATTGCTGAA       |
| CDYL       | CGAGGAGCTGTACGAGGTTG     | ACGAGTGCCTAAGGAGAGGT       |
| circCDYL   | ACCCACTAGTGCCTCAGGTG     | CTCGCTGTCATGCCTTTCC        |
| circSPECC1 | GAGAGCTGCGAAGTTCAAGA     | GCCTGTCCGTTTAGTTGTTGT      |
| ORF11      | CCCTAGCCACATCGTCATCT     | TGCAGTGTAGGTCTCCGTTT       |
| ORF19      | CATAGACATGCCCCAAAGCC     | TTCATGTACAGGGTGGGCAT       |
| ORF20      | CAACTCTCCGACTCGATCCA     | ATTTTCCTTCGGTGGTGTGC       |
| ORF25      | CATATGCCACCCTCGAATGC     | TGAGAGGTTGGGTGCAGTAG       |
| ORF58      | GCTGAATCTCGACCCCAT       | CTGACTCCGGTCTGAATGG        |
| ORF61      | AATGAGCCGGGTACTTTGGA     | CCAGAGTTCCATGTATGCGC       |
| ORF64      | TGAGGTGCGGTTTTGAGTCGA    | TATGACGTGTGCAGGACTGT       |
| ORF73      | GCAGACTACACCTCCACACT     | GTAGATCGGGGACTCTGTGG       |
| K4         | CAGCGAGCAGTGACTGGTAA     | GCATAGACCGGACAAGTGCT       |
| K10        | GGATACAGACGCGTGACAAC     | CCAGCTCTGTCGGTAAATGC       |
| K8 alpha   | CCACCAAGAGGACCACACATTC   | CACACAAAGTCTGGCATGGTTCTCCC |
| FUS        | AGCGGTGTTGGAACCTCG       | GACTGCTCTGCTGGGAATAG       |
| ORF45      | TACCAGAGGAGGCGGTAGAC     | TCCGGACGTGAACAATGAGG       |
| ORF69      | TCTGGGAGAACTGCGCTTA      | CAAGTGCGGTTCCTTTTGA        |
| K7         | CTGCCGCTTCACCTATGGAT     | ATTGCCAAAAGCGACGCAAT       |
| K8 beta    | CCACCAAGAGGACCACACATTC   | GCTGCCGGGATAACAATTCCTTC    |

## Supplementary Table 1.

List of primers used in this study.

Supplementary Source data

2C

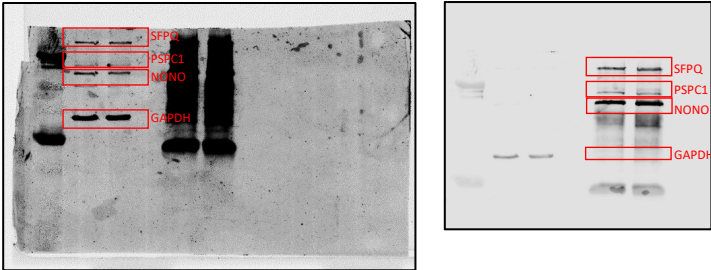

2E

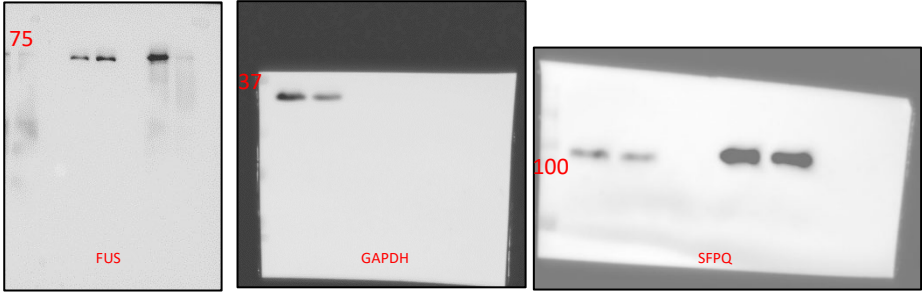

2F

|        | 0hr     |          |          | 24hr     |          |          |
|--------|---------|----------|----------|----------|----------|----------|
| Scr    | 1       | 1        | 1        | 1.261377 | 0.986233 | 0.864537 |
| FUS KD | 0.07911 | 0.077482 | 0.062935 | 0.061214 | 0.089622 | 0.079384 |

2G

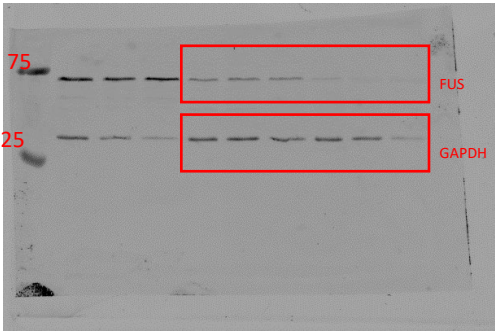

|    | Scr      |          |          | FUS KD   |          |          |
|----|----------|----------|----------|----------|----------|----------|
| 0  | 1        | 1        | 1        | 0.069592 | 0.020927 | 0.03442  |
| 24 | 1.420791 | 1.437153 | 1.300496 | 0.060206 | 0.026414 | 0.025284 |
| 48 | 1.005808 | 1.206363 | 1.096374 | 0.160881 | 0.051154 | 0.033442 |

2I

| Scr | KD       |
|-----|----------|
| 1   | 0.222211 |
| 1   | 0.133972 |
| 1   | 0.085378 |

2J

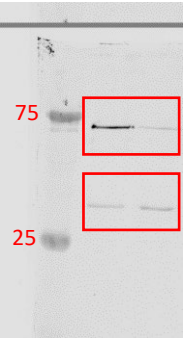

| Scr | KD       |
|-----|----------|
| 1   | 0.118421 |
| 1   | 0.083562 |
| 1   | 0.080068 |

2P

| 16hr | 24hr  |
|------|-------|
| 10.9 | 100   |
| 21.7 | 85    |
| 20.8 | 88.88 |



3A

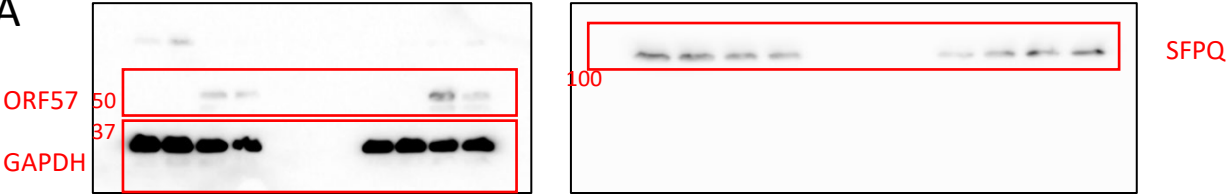

3B

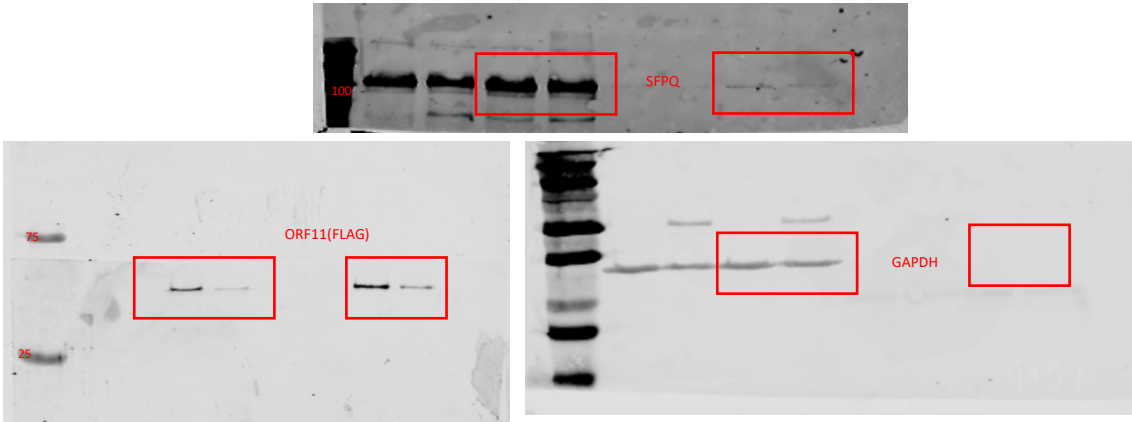

3C

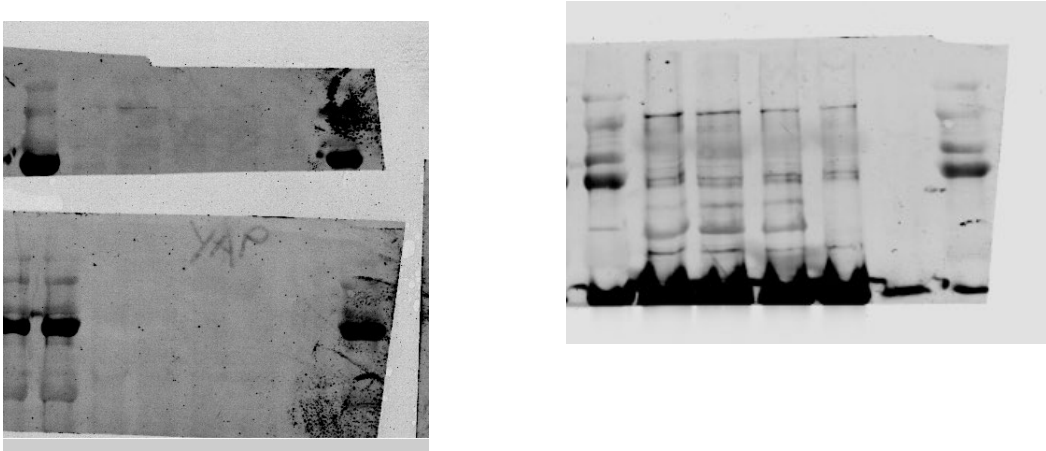

3G

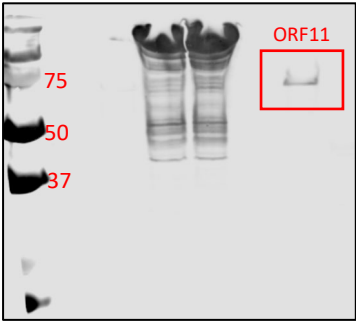

3J

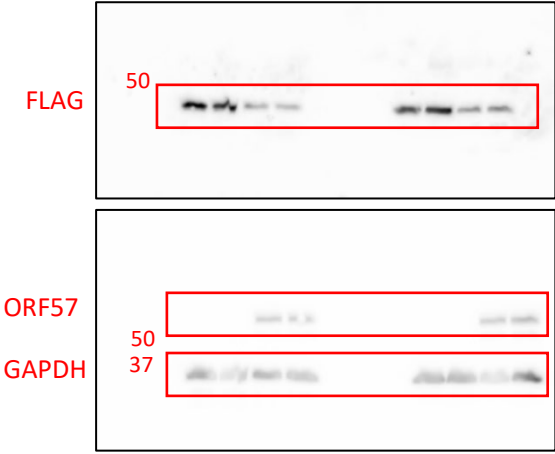

4A

|      | Scr      |          |          | SFPQ KD  |          |          |
|------|----------|----------|----------|----------|----------|----------|
| 0hr  | 1        | 1        | 1        | 0.598739 | 0.514057 | 0.340329 |
| 24hr | 1.284524 | 1.060688 | 1.261377 | 0.565779 | 0.348686 | 0.342696 |

4B

|      | Scr      |          |          | SFPQ KD  |          |          |
|------|----------|----------|----------|----------|----------|----------|
| 0hr  | 1        | 1        | 1        | 0.42271  | 0.233725 | 0.219149 |
| 24hr | 0.881241 | 1.228603 | 0.723191 | 0.406529 | 0.270741 | 0.232344 |

4C

|      | Scr      |          |          | NONO KD  |          |          |
|------|----------|----------|----------|----------|----------|----------|
| 0hr  | 1        | 1        | 1        | 0.042837 | 0.012958 | 0.051653 |
| 24hr | 1.006956 | 0.752623 | 0.904379 | 0.148137 | 0.012132 | 0.091189 |

4D

|      | Scr      |          |          | NONO KD  |          |          |
|------|----------|----------|----------|----------|----------|----------|
| 0hr  | 1        | 1        | 1        | 0.067397 | 0.102457 | 0.009284 |
| 24hr | 0.790856 | 0.766547 | 1.255449 | 0.060674 | 0.030187 | 0.008223 |

4F

|    | scr      |         |          | NEAT1 KD |          |          |
|----|----------|---------|----------|----------|----------|----------|
| 0  | 1        | 1       | 1        | 0.156222 | 0.203298 | 0.27355  |
| 24 | 0.837987 | 1.22264 | 1.058154 | 0.130912 | 0.191003 | 0.184369 |

4G

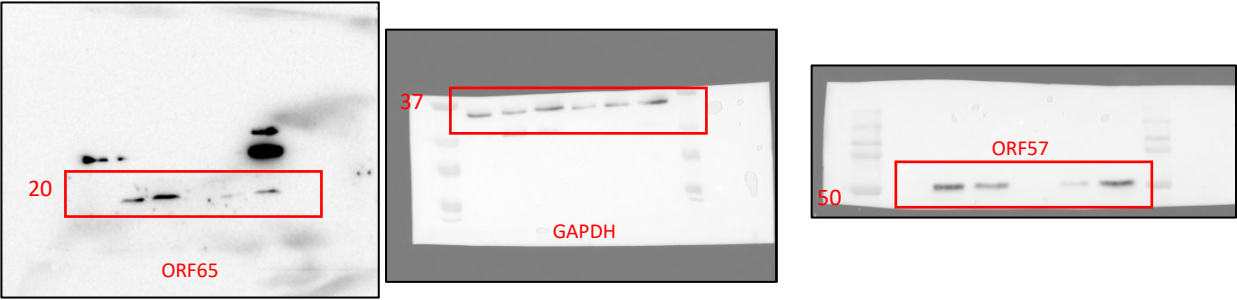

|    | Scr      |          |          | NEAT1 KD |          |          |
|----|----------|----------|----------|----------|----------|----------|
| 24 | 1        | 1        | 1        | 0.909158 | 0.543209 | 1.027999 |
| 48 | 0.525538 | 0.286097 | 0.609374 | 0.203666 | 0.136013 | 0.524358 |

|    | Scr      |          |          | NEAT1 KD |          |          |
|----|----------|----------|----------|----------|----------|----------|
| 24 | 0.761928 | 0.990124 | 0.345034 | 0.063163 | 0.174968 | 0.080454 |
| 48 | 1        | 1        | 1        | 0.344354 | 0.323595 | 0.033894 |

5B

|       | Scr 293T |   |   | SFPQ KD |        |          |
|-------|----------|---|---|---------|--------|----------|
| ORF28 | 1        | 1 | 1 | 0.92    | 0.89   | 0.8      |
| ORF30 | 1        | 1 | 1 | 0.99    | 0.84   | 0.95     |
| ORF34 | 1        | 1 | 1 | 0.9     | 0.92   | 0.85     |
| ORF57 | 1        | 1 | 1 | 0.97    | 0.8315 | 0.956696 |
| ORF65 | 1        | 1 | 1 | 1.29    | 0.94   | 1.07     |
| ORF69 | 1        | 1 | 1 | 0.92    | 0.82   | 1.09     |

5C

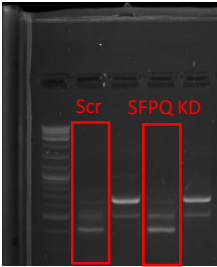

5D

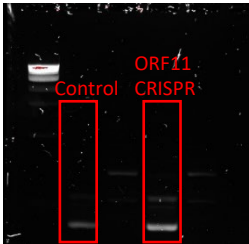

5E

|      | circCDYL |          |          | CDYL     |          |          |
|------|----------|----------|----------|----------|----------|----------|
| 0hr  | 1        | 1        | 1        | 1        | 1        | 1        |
| 24hr | 2.394957 | 2.789487 | 3.193194 | 1.156688 | 1.670176 | 1.185961 |

5F

|      | circEYA1 |          |          | EYA1     |          |          |
|------|----------|----------|----------|----------|----------|----------|
| 0hr  | 1        | 1        | 1        | 1        | 1        | 1        |
| 24hr | 3.305801 | 4.438278 | 5.133704 | 0.993092 | 0.639493 | 0.904379 |

5G

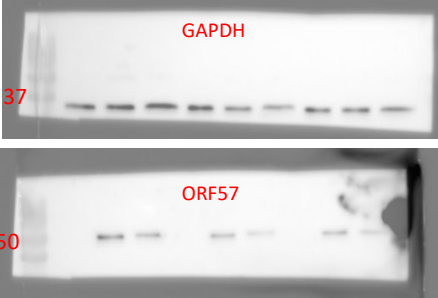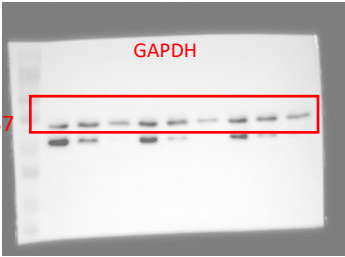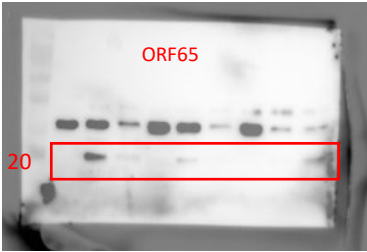

|    | ORF57    |          |          |             |          |          |             |          |          |
|----|----------|----------|----------|-------------|----------|----------|-------------|----------|----------|
|    | Scr      |          |          | circCDYL KD |          |          | circEYA1 KD |          |          |
| 24 | 1        | 1        | 1        | 0.841778    | 0.680197 | 0.945792 | 0.559891    | 0.103456 | 0.905171 |
| 48 | 0.484014 | 0.714433 | 0.514525 | 0.435032    | 0.29375  | 0.391121 | 0.861161    | 0.18377  | 0.727336 |

|    | ORF65    |          |          |             |         |          |             |          |          |
|----|----------|----------|----------|-------------|---------|----------|-------------|----------|----------|
|    | Scr      |          |          | circCDYL KD |         |          | circEYA1 KD |          |          |
| 24 | 1        | 1        | 1        | 0           | 0.17096 | 0.100048 | 0           | 0        | 0        |
| 48 | 0.104019 | 0.082157 | 0.249363 | 0.710035    | 0       | 0        | 0           | 4.98E-01 | 4.16E-02 |

5H

|      | Scr      |         |          | SFPQ KD  |          |          |
|------|----------|---------|----------|----------|----------|----------|
| 0hr  | 1        | 1       | 1        | 0.888843 | 0.864537 | 0.64842  |
| 24hr | 3.386981 | 4.69134 | 4.626753 | 1.993081 | 1.94531  | 1.489677 |

5I

|      | Scr     |          |          | SFPQ KD  |          |          |
|------|---------|----------|----------|----------|----------|----------|
| 0hr  | 1       | 1        | 1        | 0.50698  | 0.737135 | 0.724471 |
| 24hr | 1.93858 | 3.193194 | 2.592222 | 0.832199 | 1.252664 | 1.370783 |

5J

|      | Scr      |          |          | NONO KD  |          |          |
|------|----------|----------|----------|----------|----------|----------|
| 0hr  | 1        | 1        | 1        | 0.923382 | 0.752623 | 0.873573 |
| 24hr | 2.877867 | 2.479415 | 2.386671 | 1.125058 | 1.046085 | 0.702222 |

5K

|      | Scr      |          |          | NONO KD  |          |          |
|------|----------|----------|----------|----------|----------|----------|
| 0hr  | 1        | 1        | 1        | 0.532185 | 0.420448 | 0.503478 |
| 24hr | 3.271608 | 2.703822 | 4.213444 | 0.702222 | 0.732043 | 0.929805 |

6C

| Latent   | Lytic | KD       |
|----------|-------|----------|
| 0.061214 | 1     | 0.655197 |
| 0.143587 | 1     | 0.671286 |
| 0.080772 | 1     | 0.493116 |

| Untrained | PG |
|-----------|----|
| 0         | 0  |
| 0         | 0  |
| 0         | 0  |
| 0         | 0  |
| 0         | 0  |
| 0         | 0  |
| 0         | 0  |
| 1         | 0  |
| 1         | 0  |
| 1         | 0  |
| 2         | 0  |
| 2         | 0  |
| 2         | 0  |
| 2         | 0  |
| 2         | 0  |
| 2         | 0  |
| 2         | 0  |
| 3         | 0  |
| 3         | 0  |
| 3         | 0  |
| 3         | 0  |
| 3         | 0  |
| 3         | 0  |
| 3         | 0  |
| 3         | 0  |
| 4         | 0  |
| 4         | 0  |
| 4         | 0  |
| 4         | 0  |
| 4         | 0  |
| 4         | 0  |
| 5         | 0  |
| 5         | 0  |
| 5         | 0  |
| 5         | 0  |
| 5         | 0  |
| 5         | 0  |
| 5         | 0  |
| 5         | 0  |
| 5         | 0  |
| 5         | 0  |
| 6         | 0  |
| 6         | 0  |
| 6         | 0  |
| 6         | 0  |
| 6         | 0  |
| 7         | 0  |
| 7         | 0  |
| 7         | 1  |
| 7         | 1  |
| 7         | 1  |
| 7         | 1  |
| 8         | 1  |
| 8         | 2  |
| 8         | 2  |
| 8         | 2  |
| 8         | 3  |
| 9         | 3  |
| 9         | 3  |
| 9         | 3  |
| 9         | 4  |
| 10        | 4  |
| 10        | 4  |
| 10        | 5  |

Western blot analysis of ORF65 expression in 293T cells transfected with pCMV-ORF65. The blot shows a single band in the ORF65 lane, which is highlighted by a red box. The molecular weight marker is indicated as 20 kDa.

Western blot analysis showing GAPDH and H2AX protein levels. The top panel displays GAPDH bands, and the bottom panel displays H2AX bands. Red boxes indicate the GAPDH and H2AX bands for the 'Control' and 'H2O2' lanes. GAPDH bands are consistent across all lanes, while H2AX bands are significantly more intense in the 'H2O2' lanes, indicating DNA damage.
